# Supplementary material
Source: publisher figshare collection journal article supplement (https://rs.figshare.com/ndownloader/files/14636525)
Supplement: Supplementary file 1 [file 14636525]

**Supplementary Information 1: Normality of datasets.**

This document contains histograms and quantile-quantile plots for each dataset analysed. For each dataset the raw data are shown first before the transformed data (where applicable). Datasets included are each individual species dataset, before the full dataset where all taxa were combined. Normality was considered to have been achieved when a bell-shaped histogram and an approximately linear q-q plot was achieved. Where necessary box-cox log-likelihood plots have also been included to refine power transformations.

***Dendrolagus lumholtzi***

*Asfc*

Raw


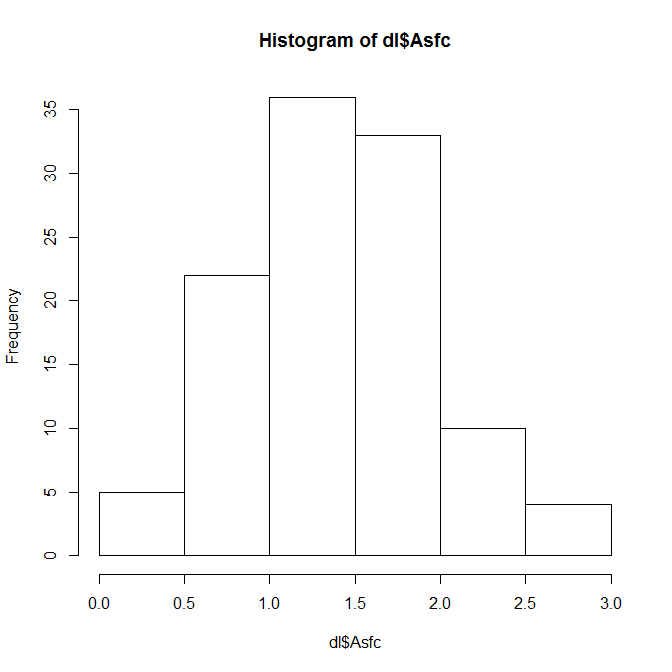

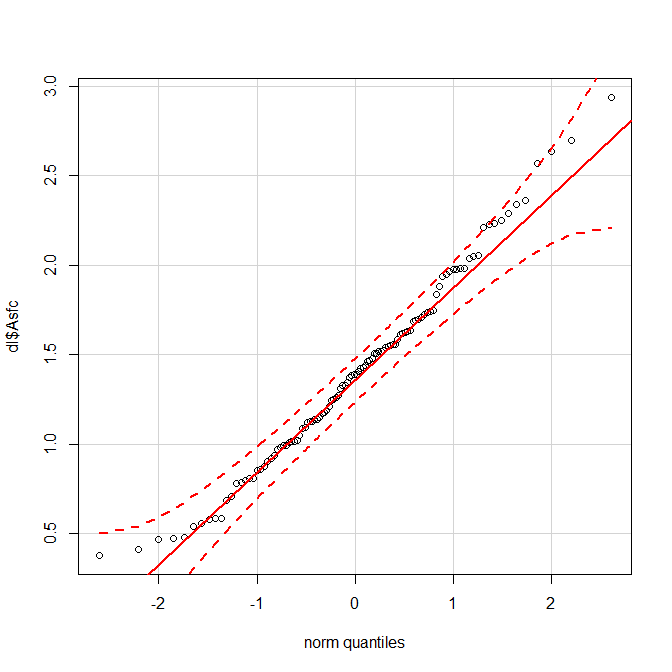

No transformation needed.

*epLsar*

Raw


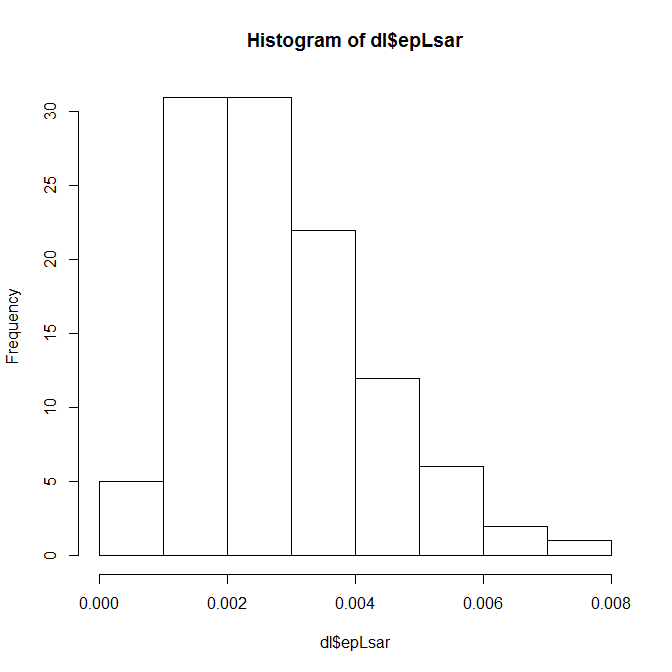

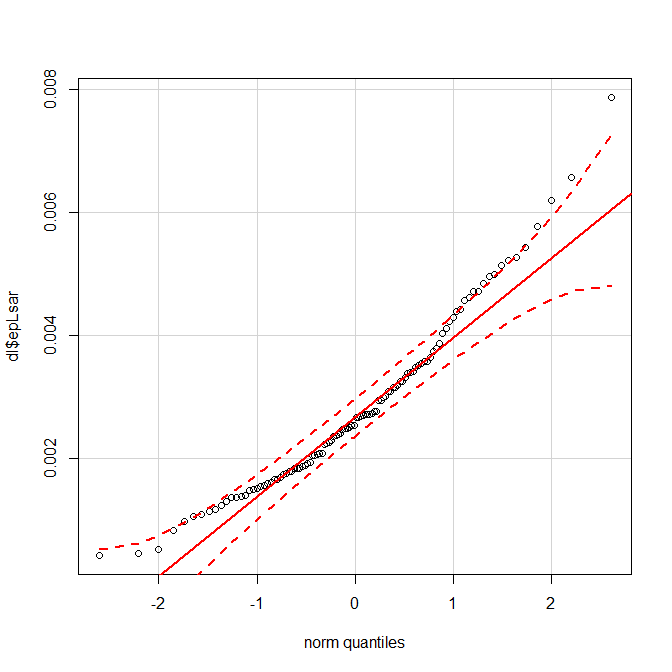


Square-root transformed


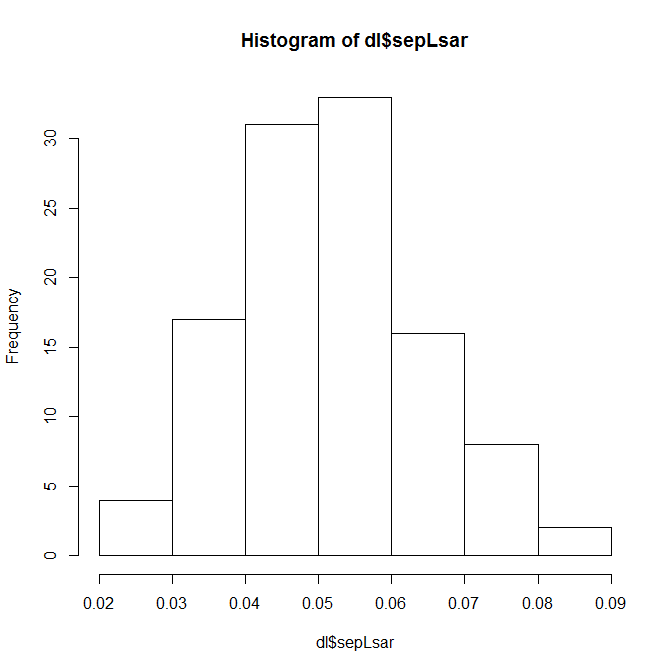

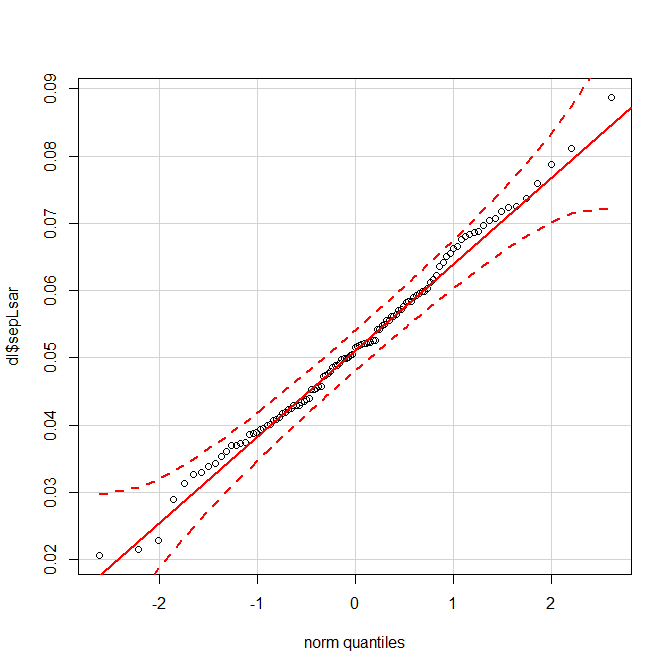


*Sdr*

Raw


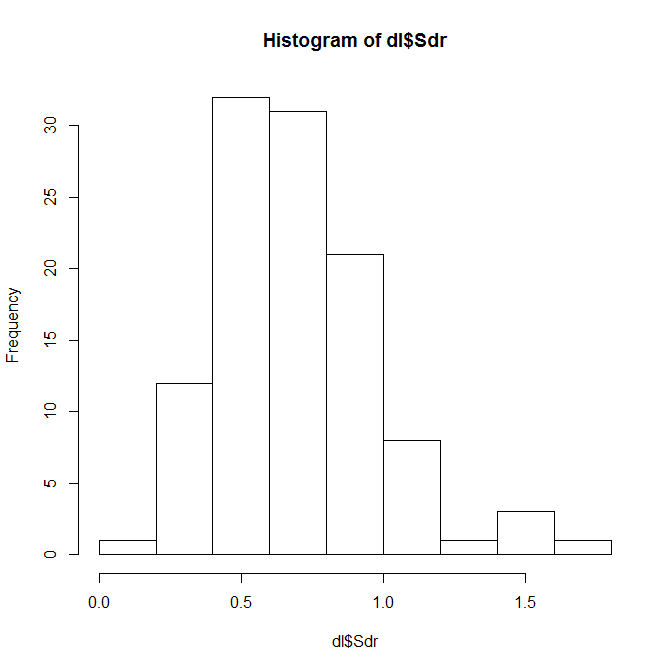

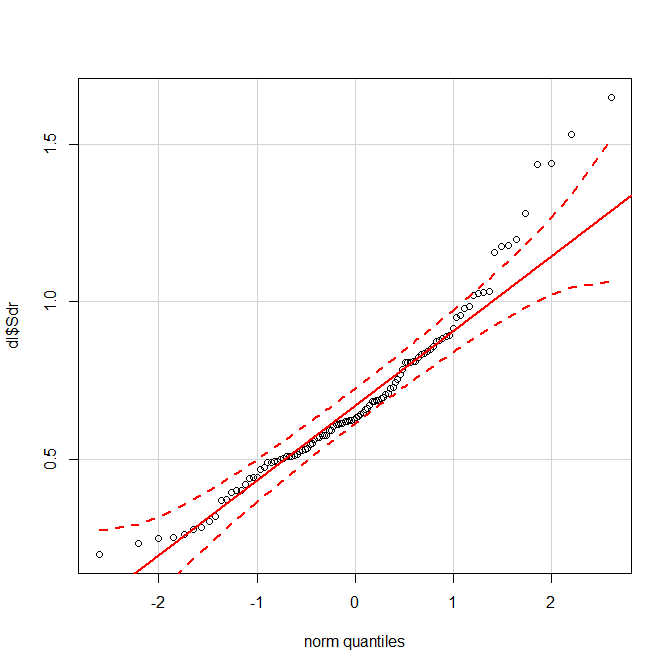


Natural logarithm transformed


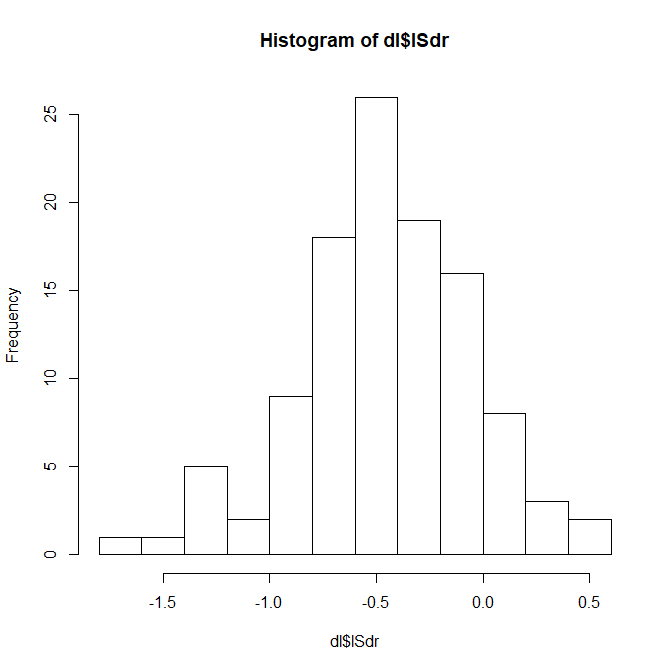

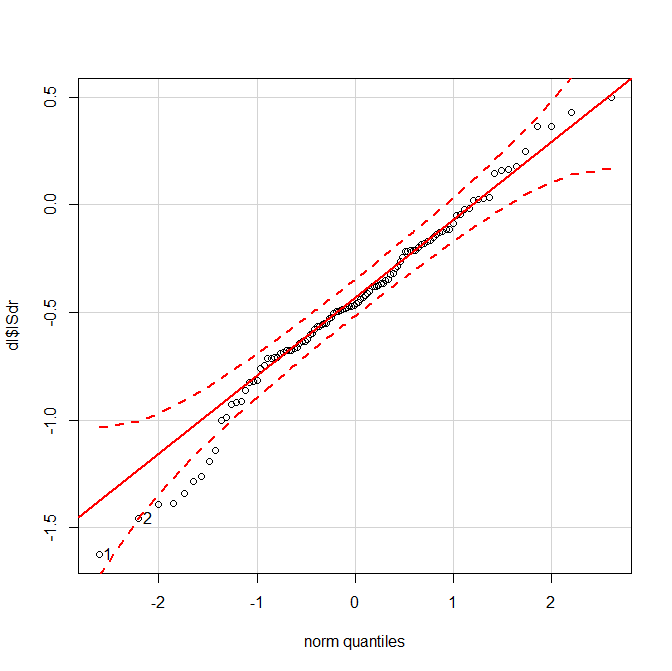


*Vvv*

Raw


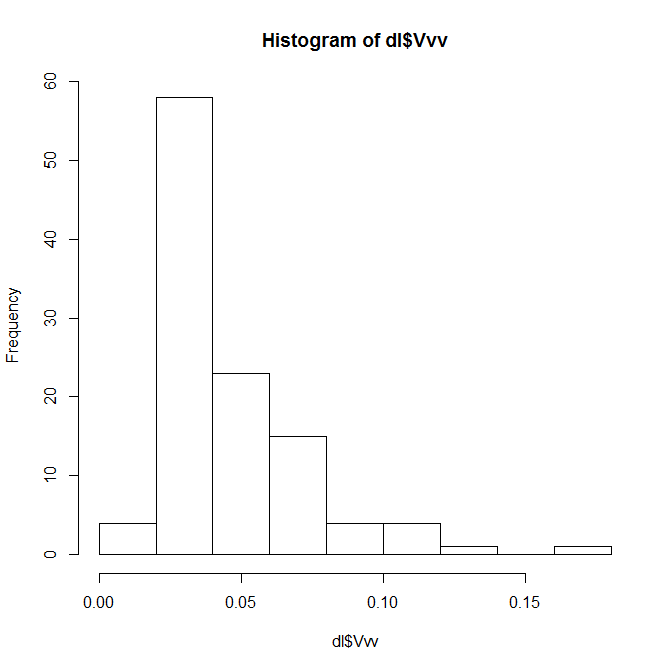

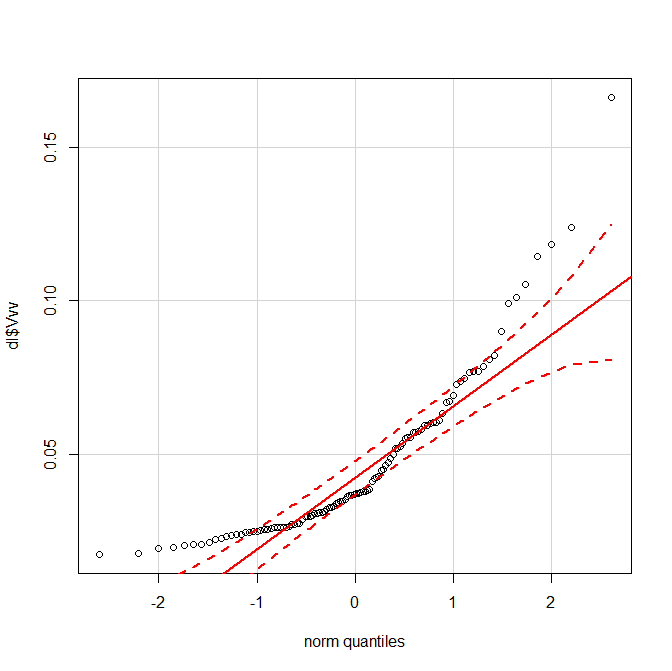


Natural logarithm transformed


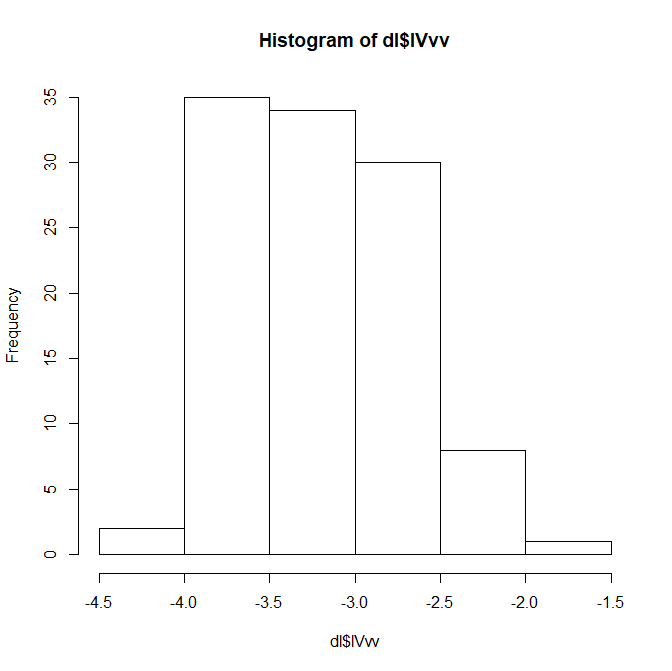

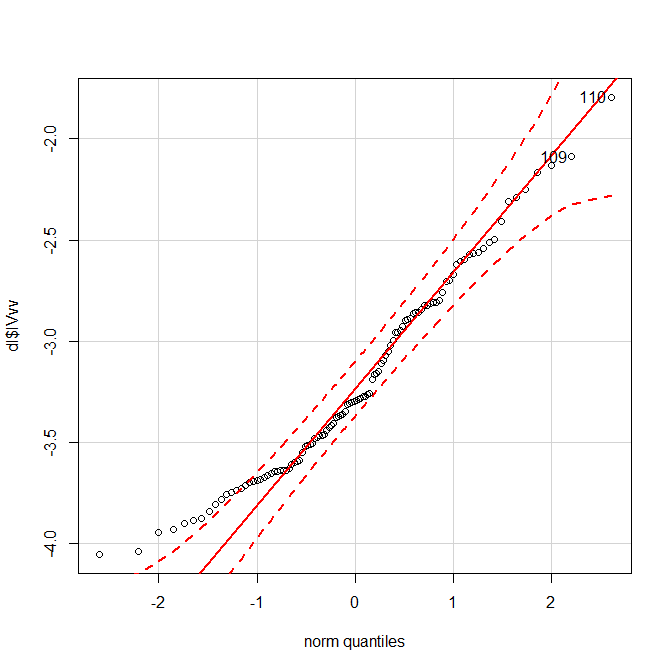


***Macropus dorsalis***

*Asfc*

Raw


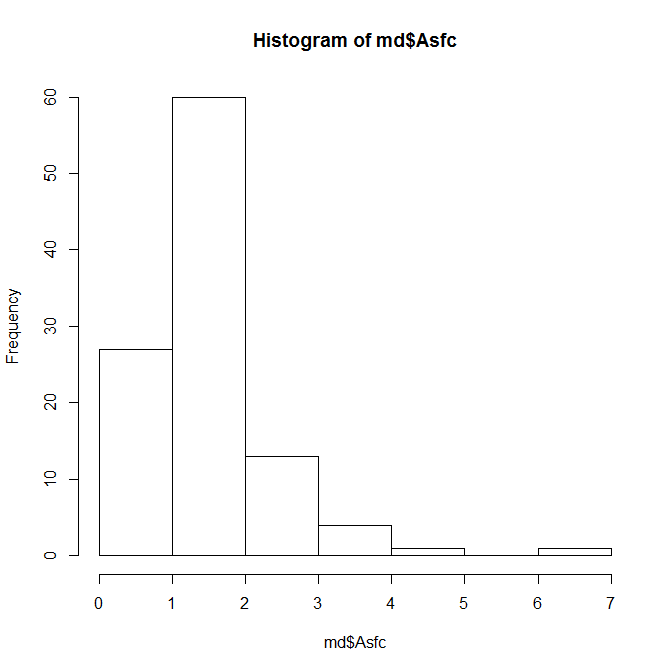

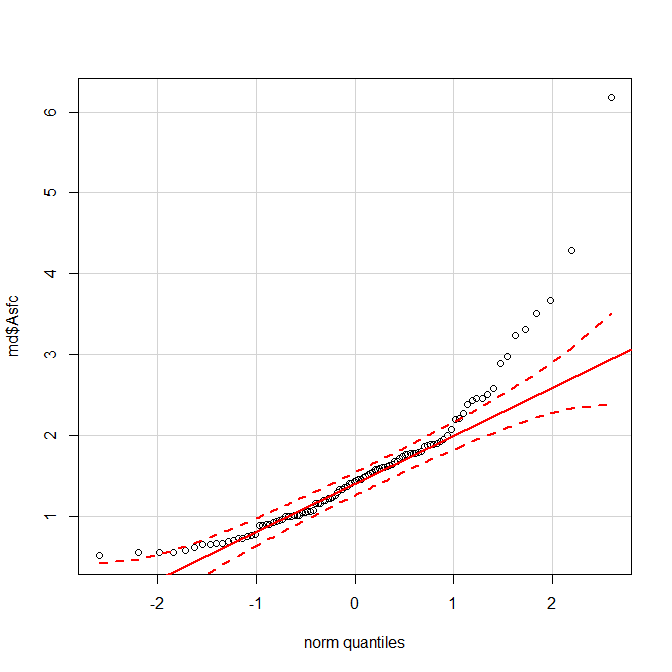


Natural logarithm transformed


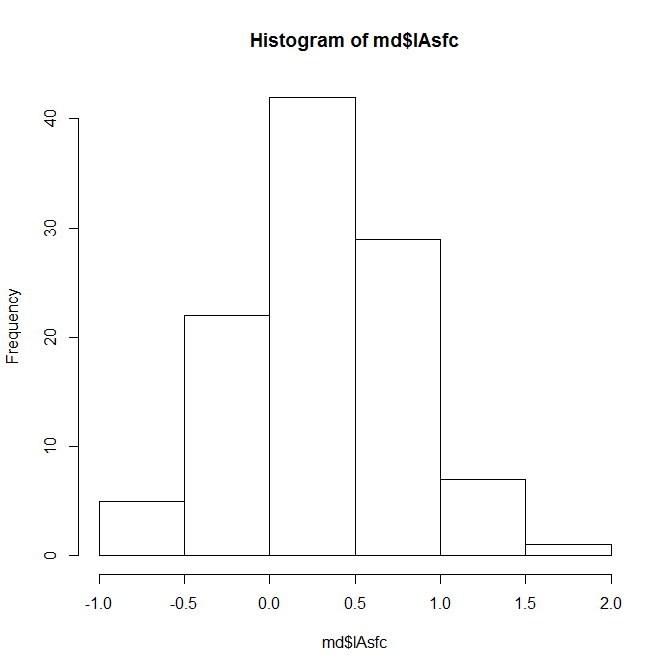

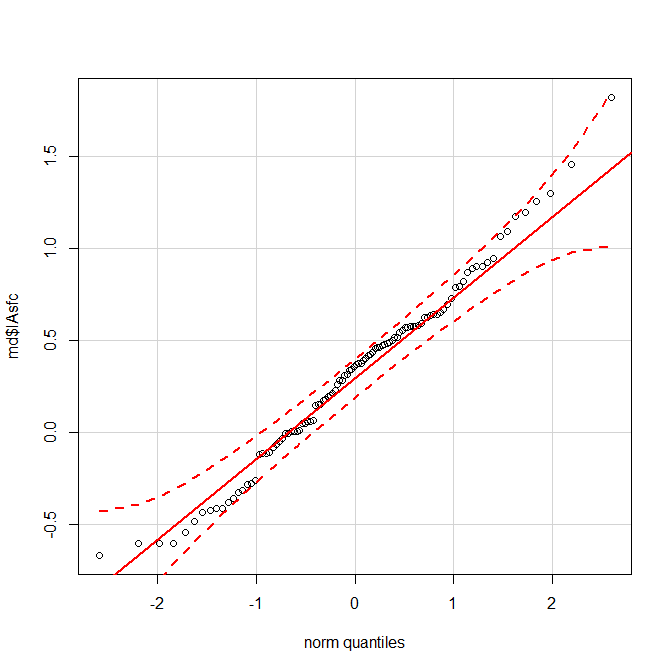


*epLsar*

Raw


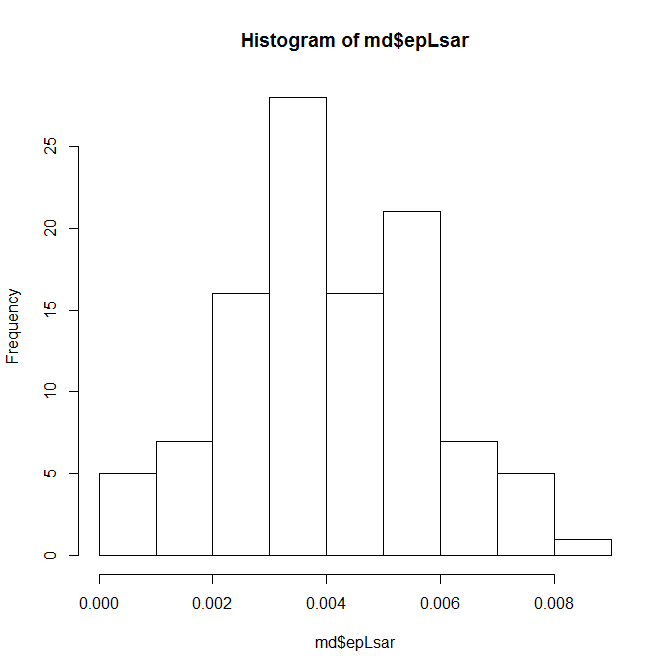

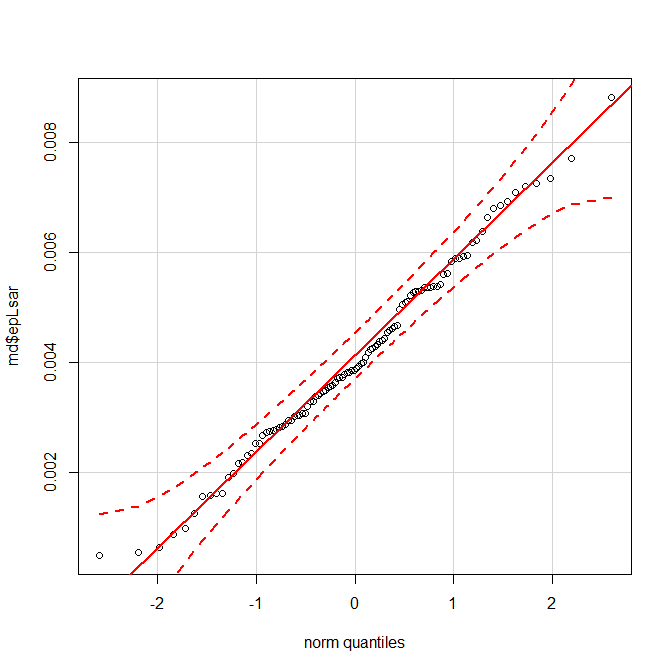


No transformation needed.

*Sdr*

Raw


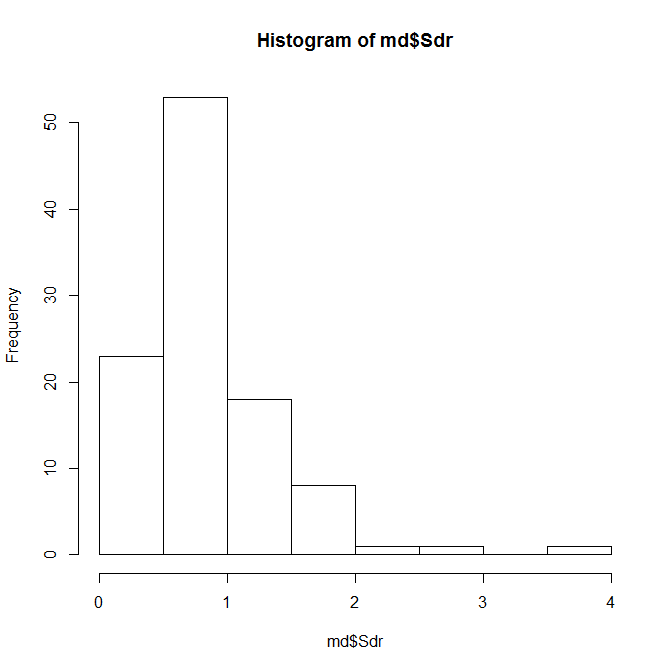

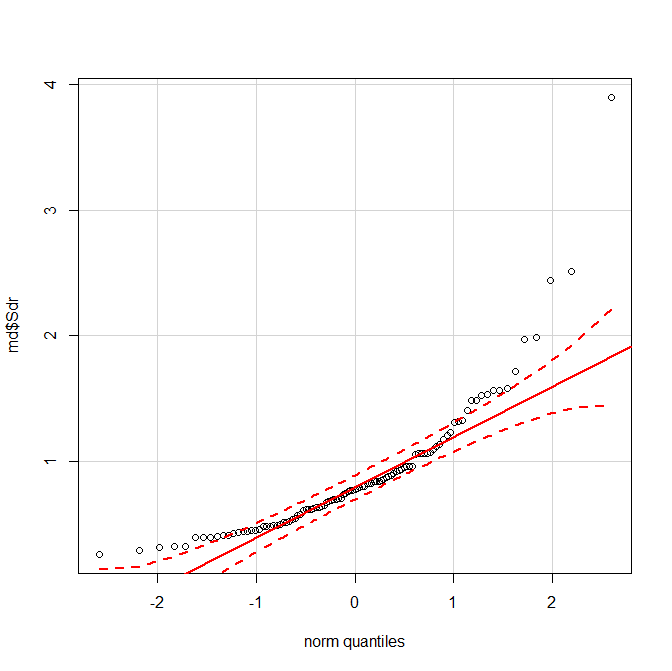
Natural logarithm transformed


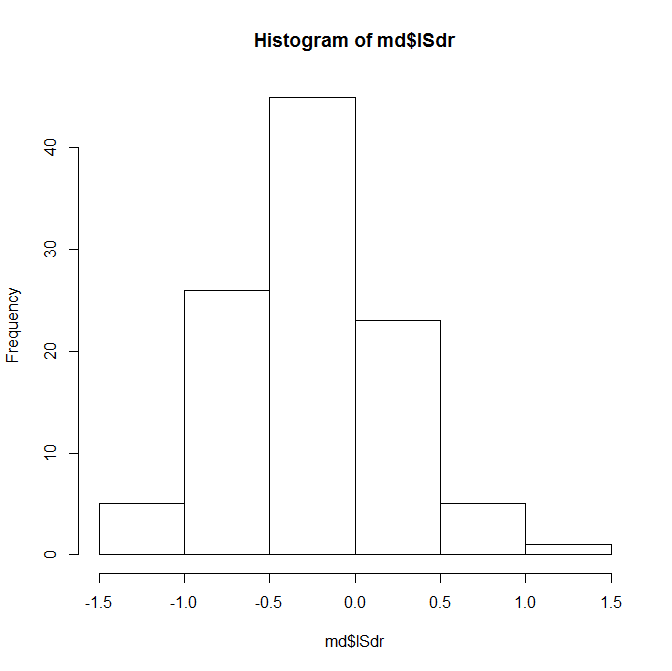

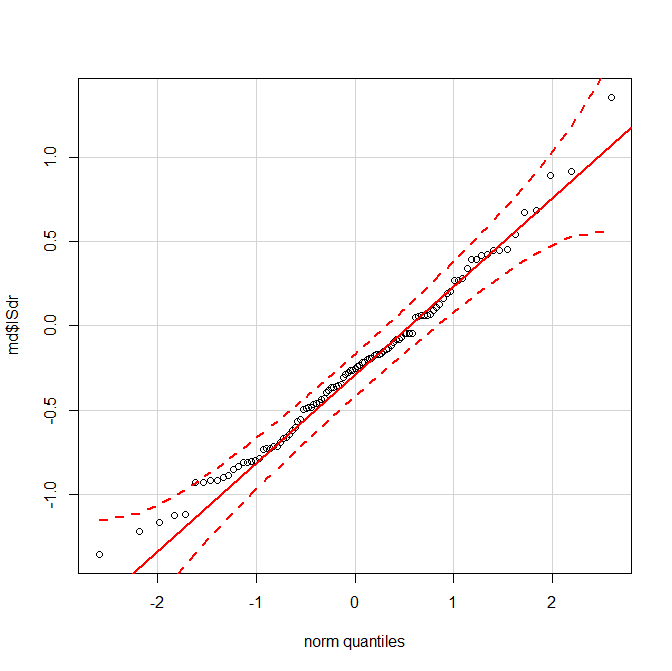


*Vvv*

Raw


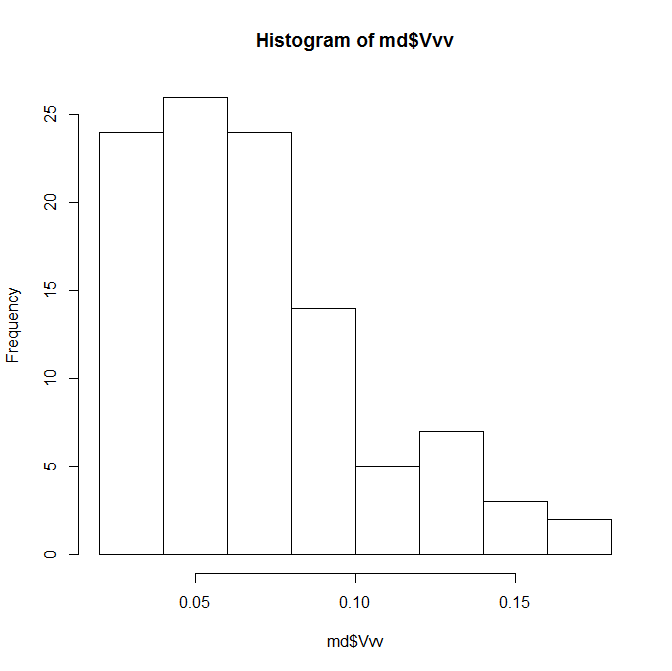

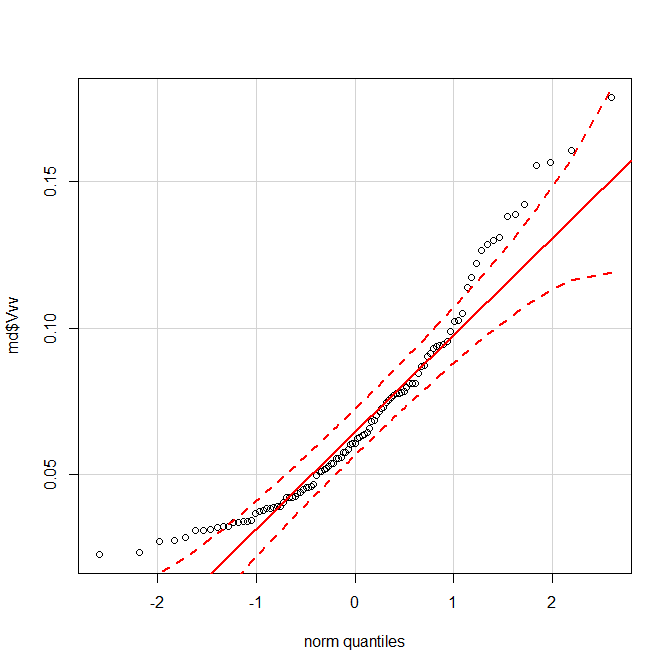


Natural logarithm transformed


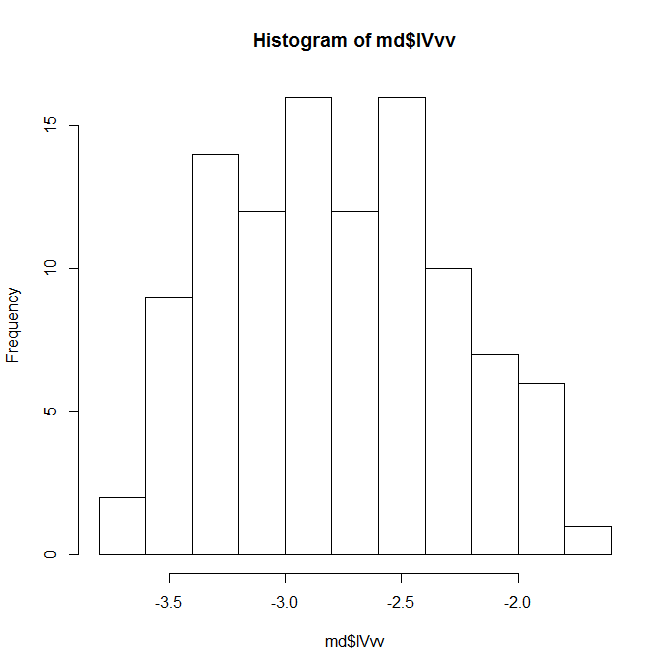

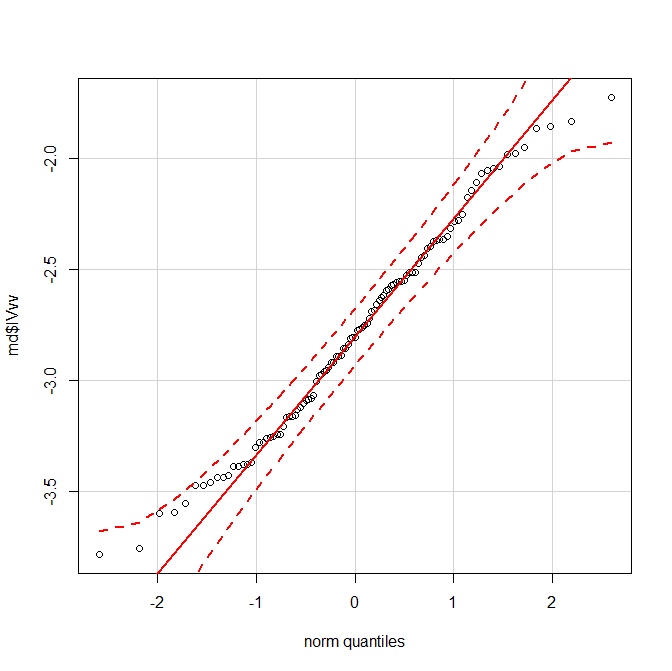


***Macropus robustus***

*Asfc*

Raw


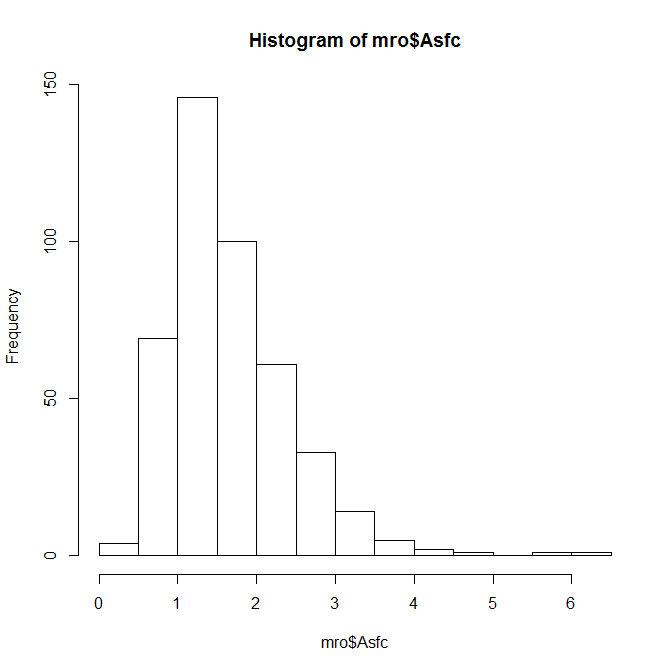

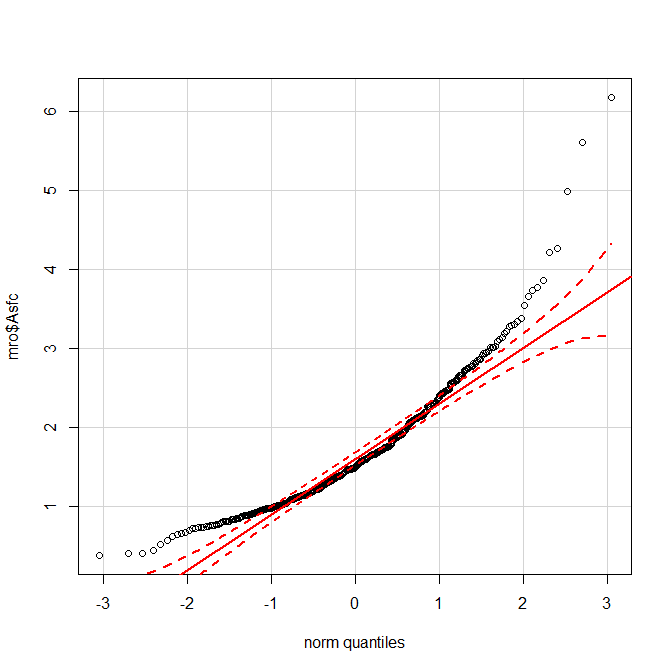
Natural logarithm transformed


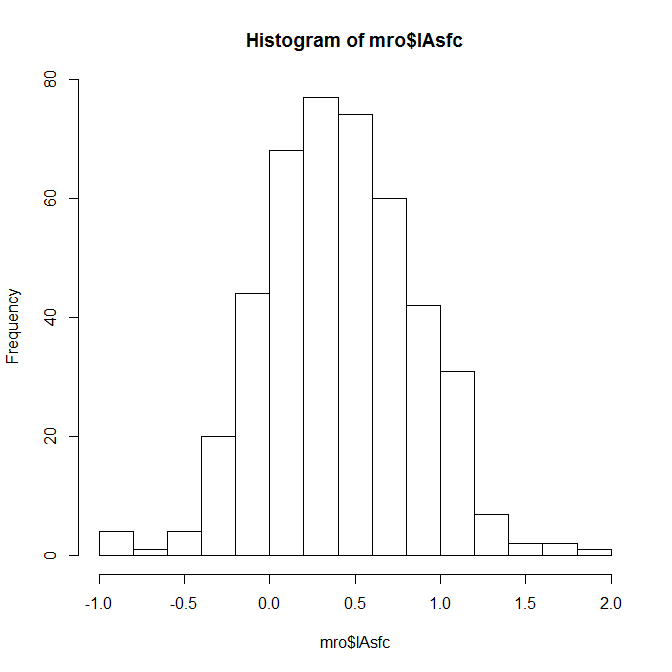

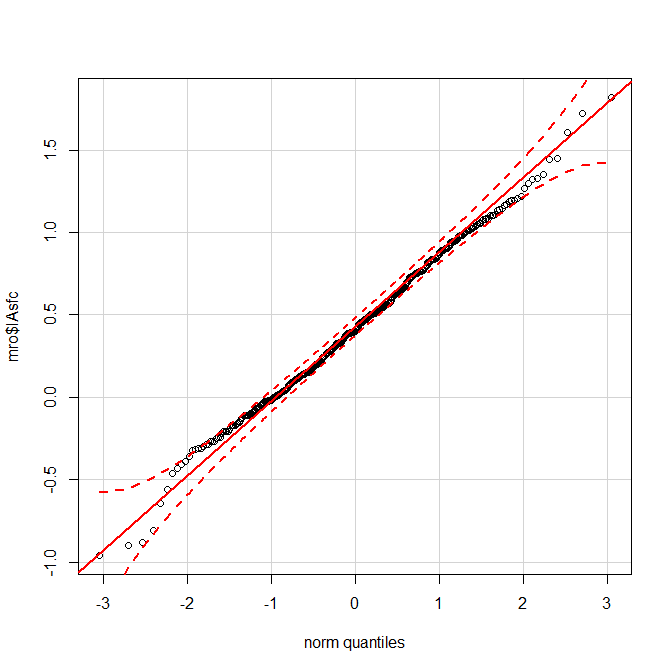


*epLsar*

Raw


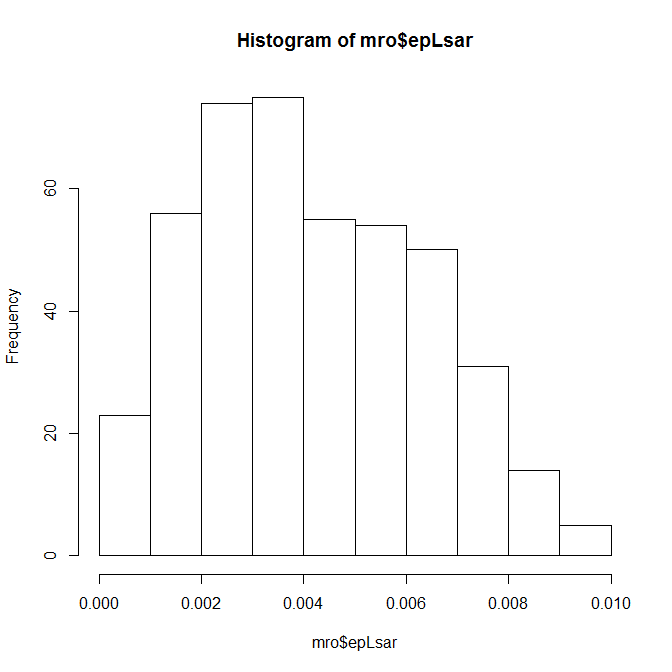

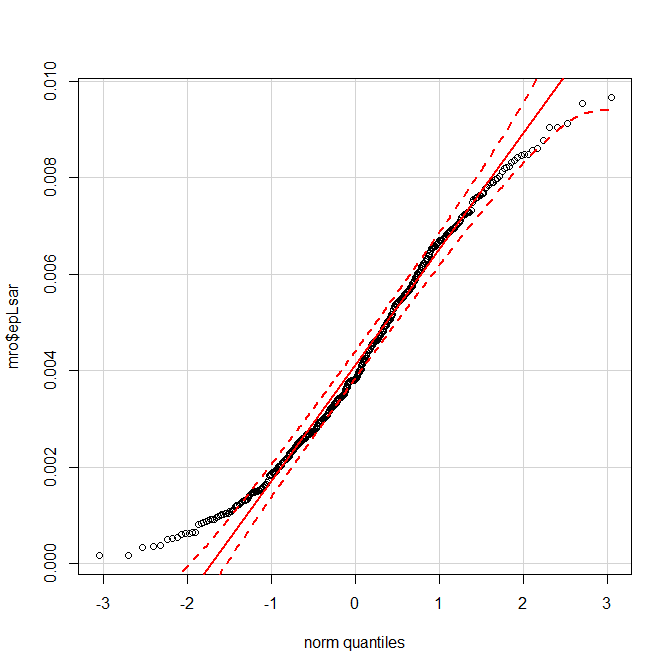


Boxcox log-likelihood


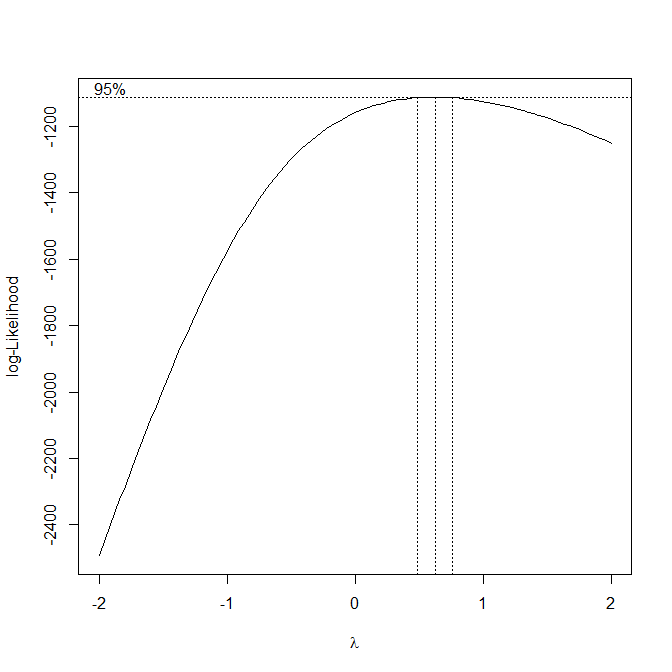


*epLsar* ^0.6


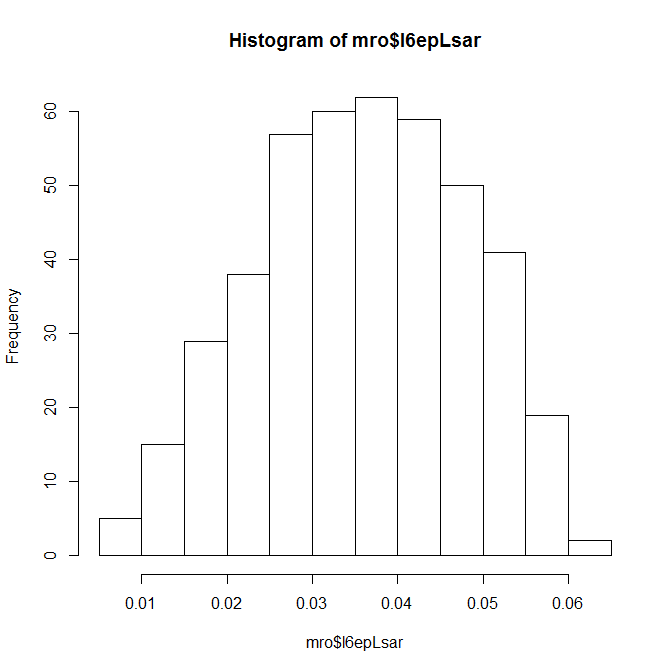

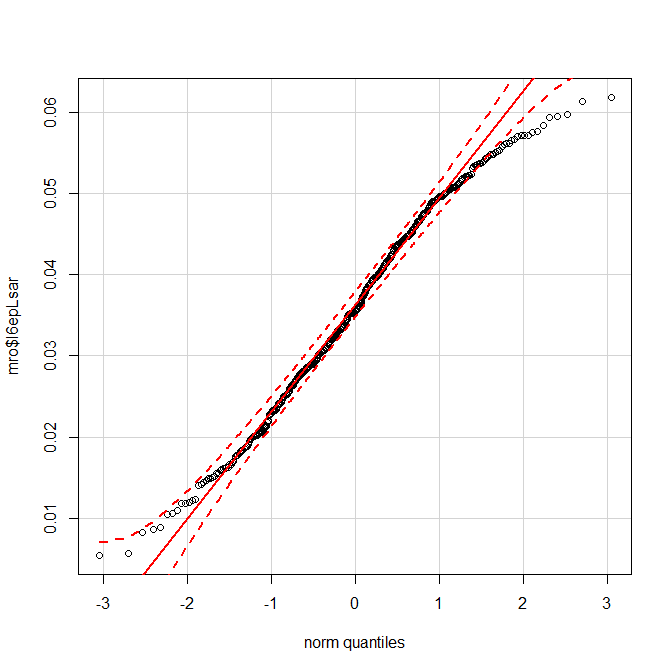


*Sdr*

Raw


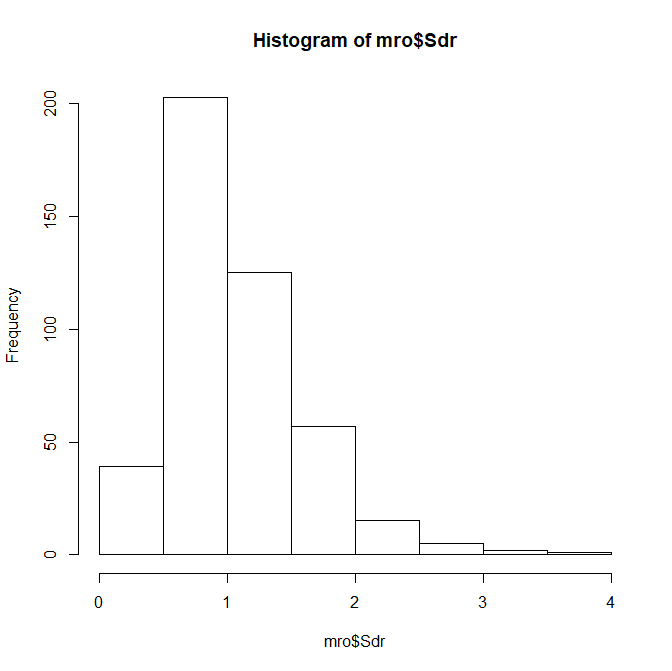

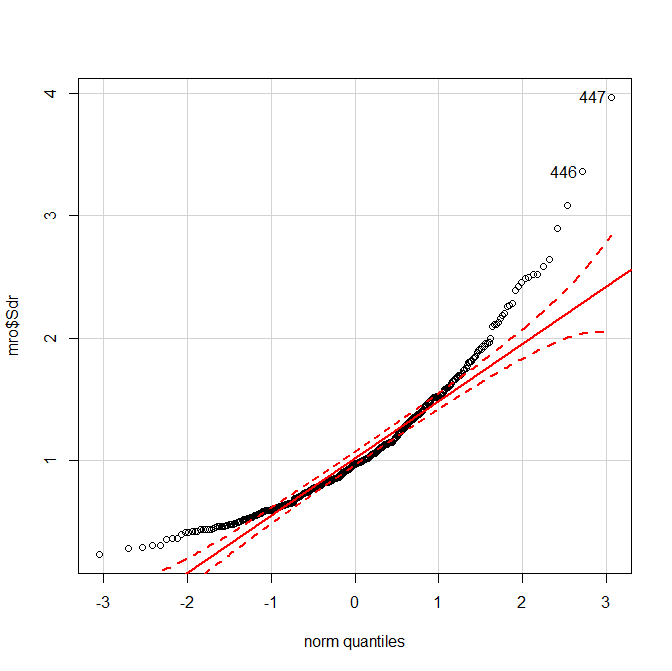


Natural logarithm transformed


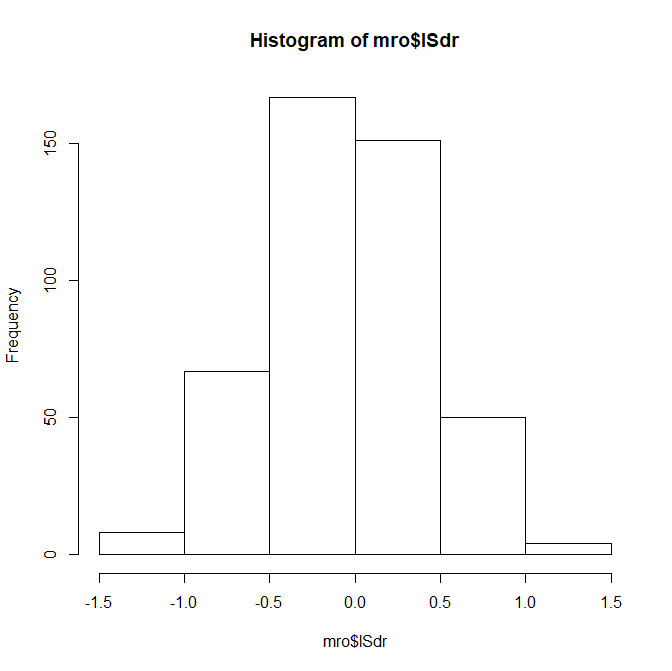

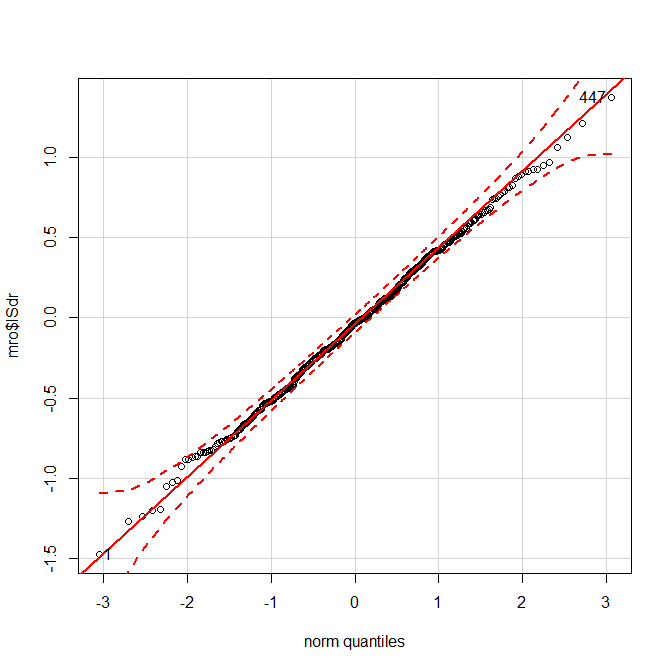


*Vvv*

Raw


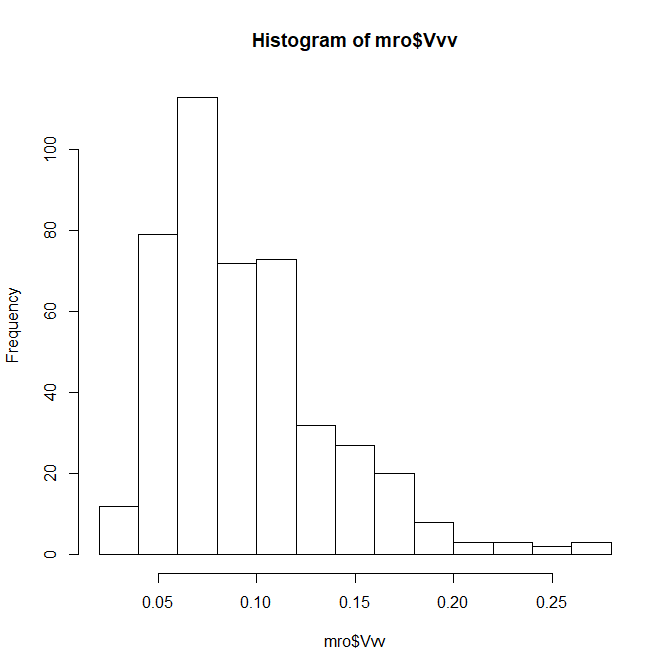

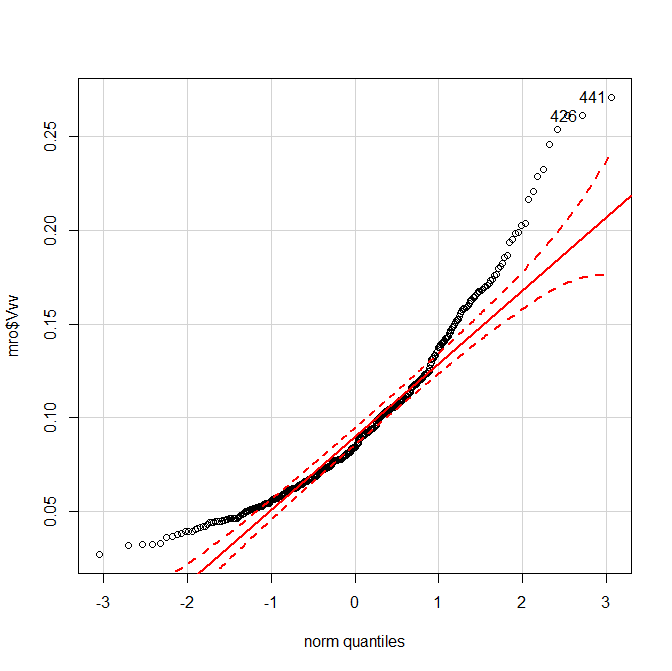


Natural logarithm transformed


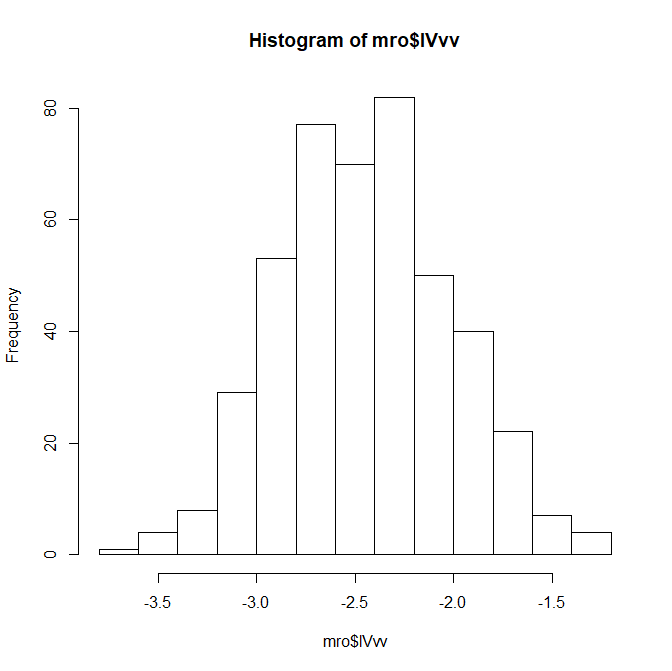

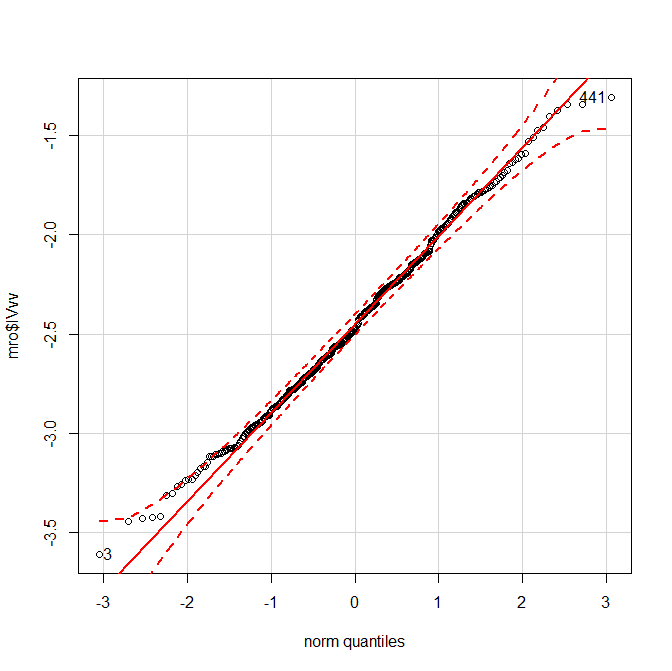


***Macropus rufogriseus***

*Asfc*

Raw


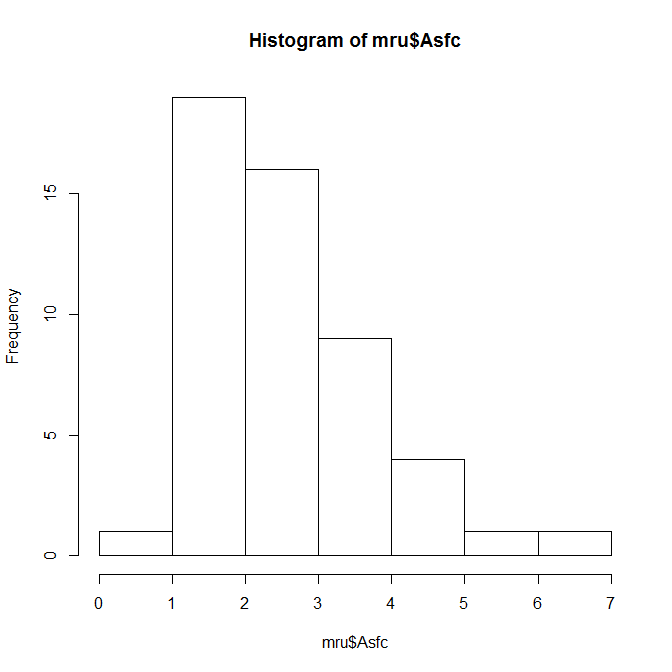

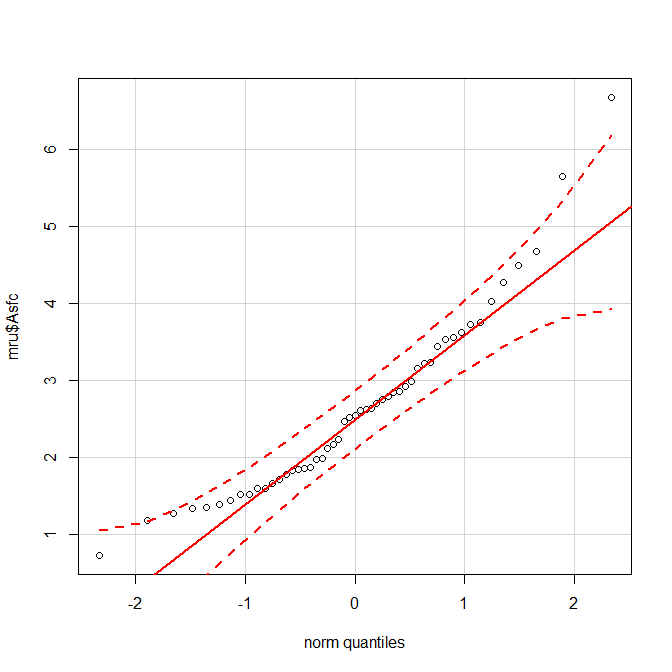


Natural logarithm transformed


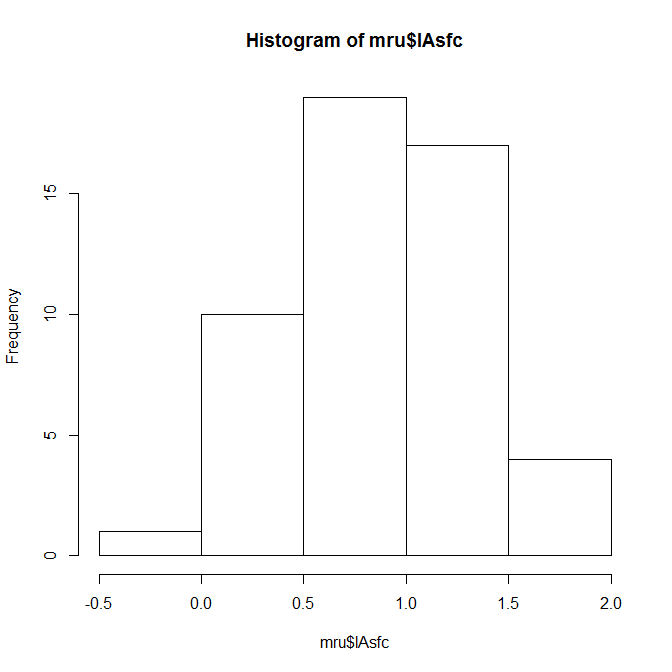

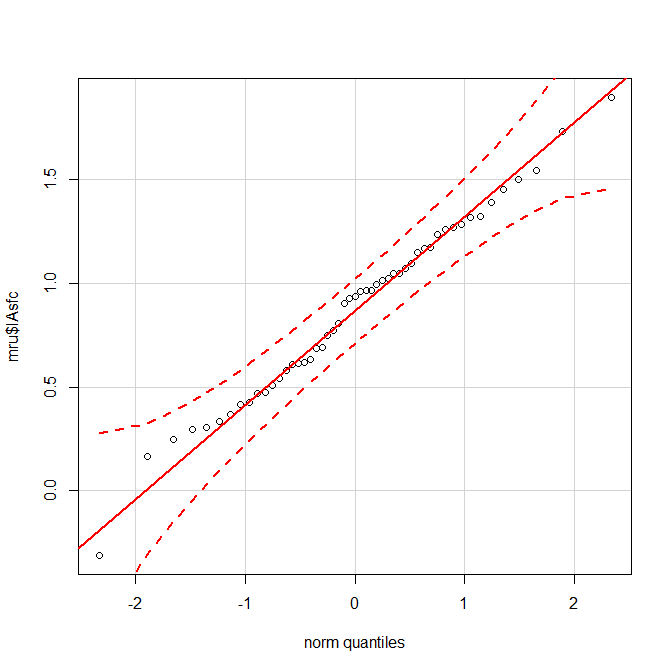


*epLsar*

Raw


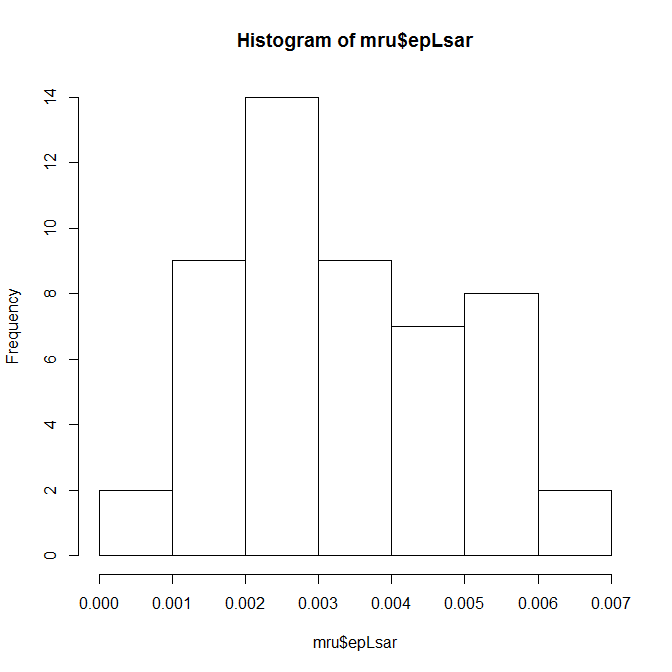

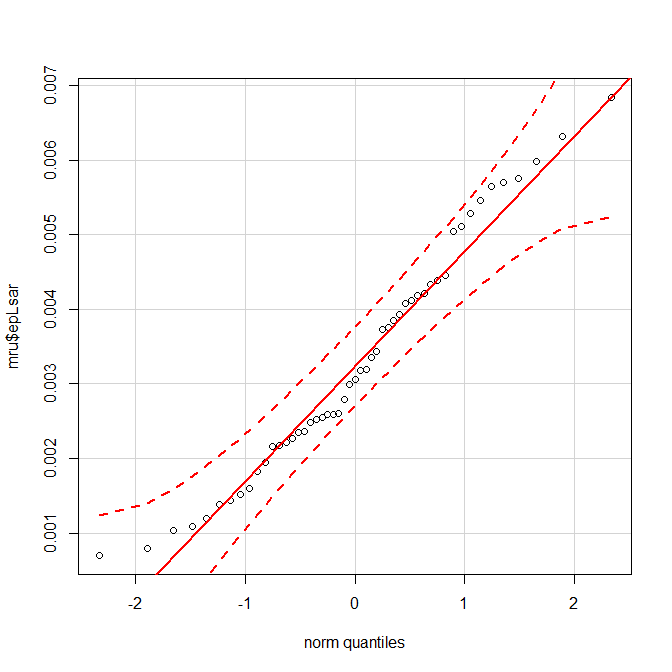


No transformation needed.

*Sdr*

Raw


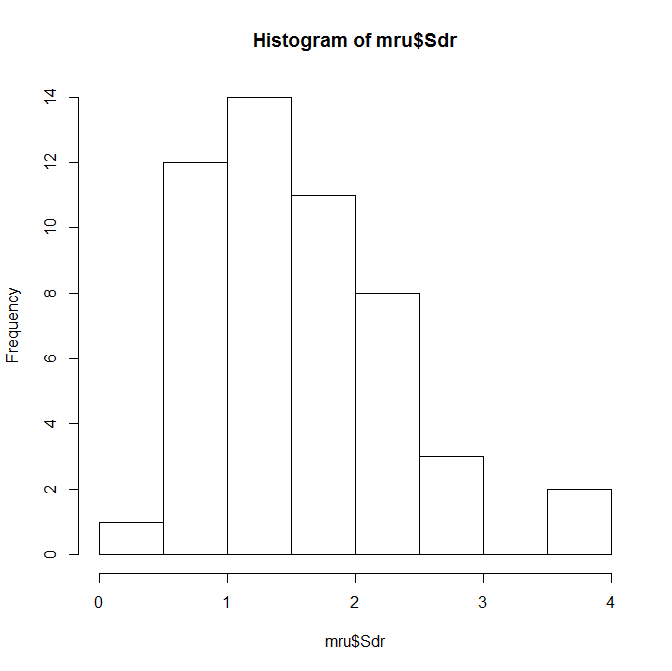

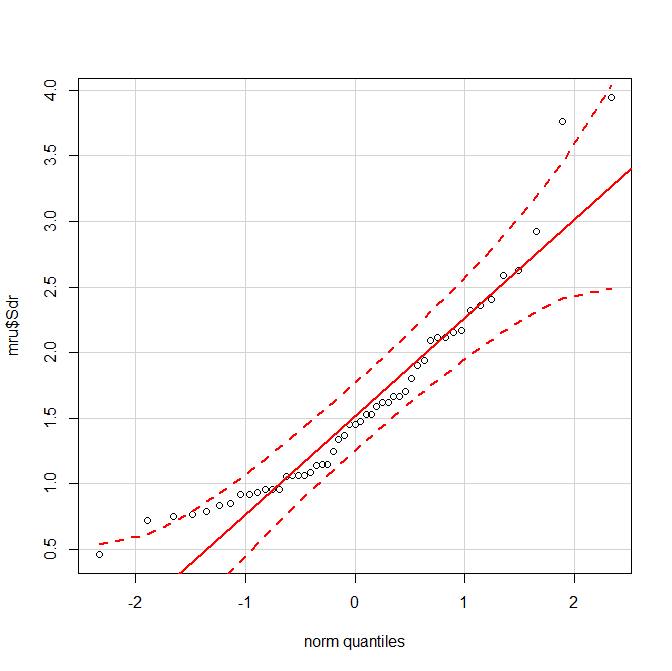


Natural logarithm transformed


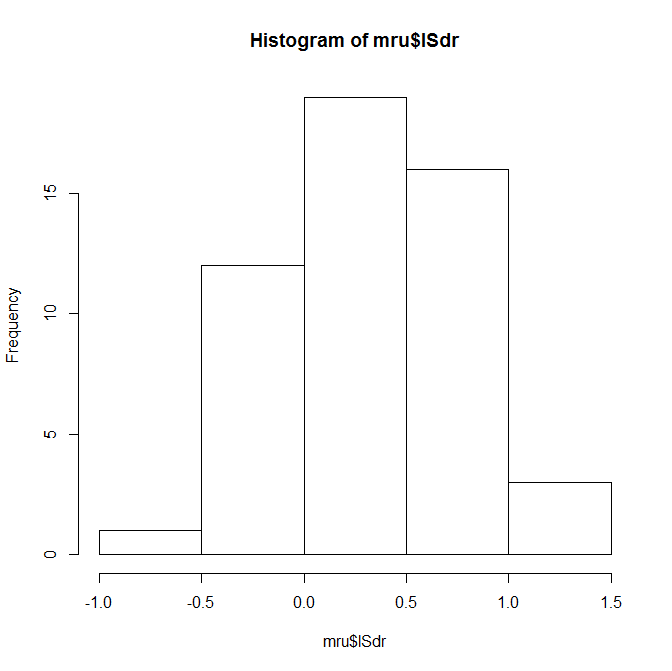

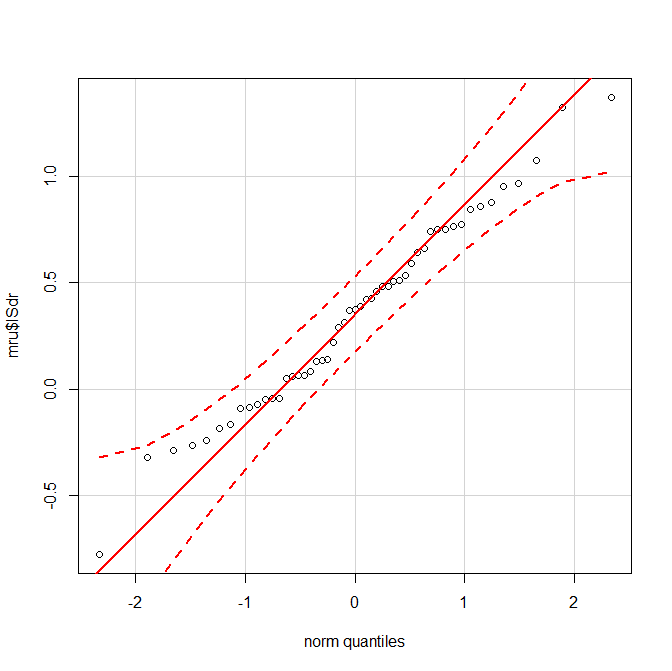


*Vvv*

Raw


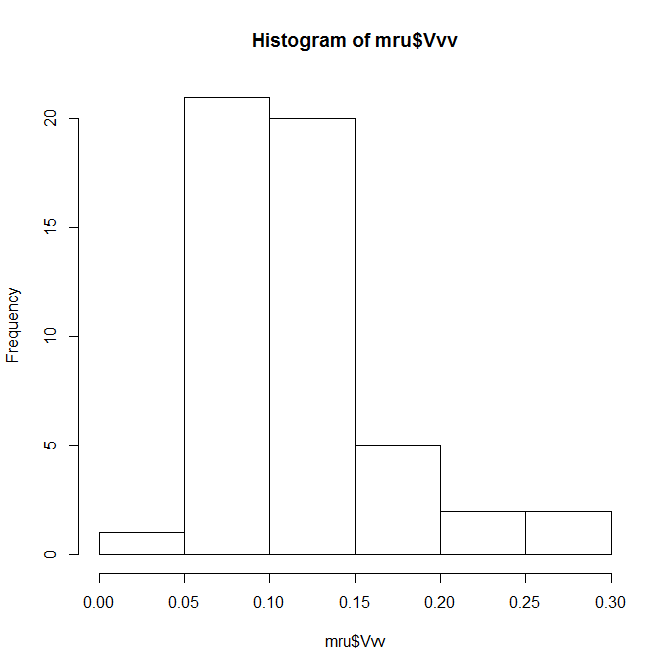

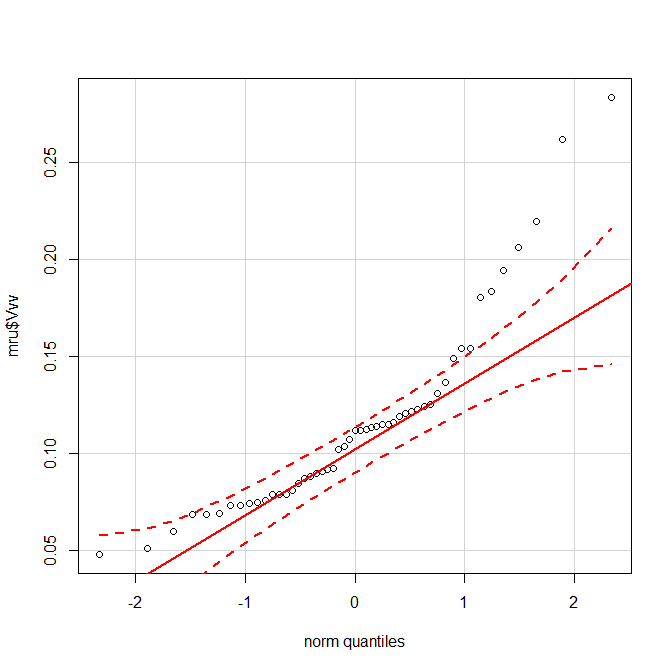


Natural logarithm transformed


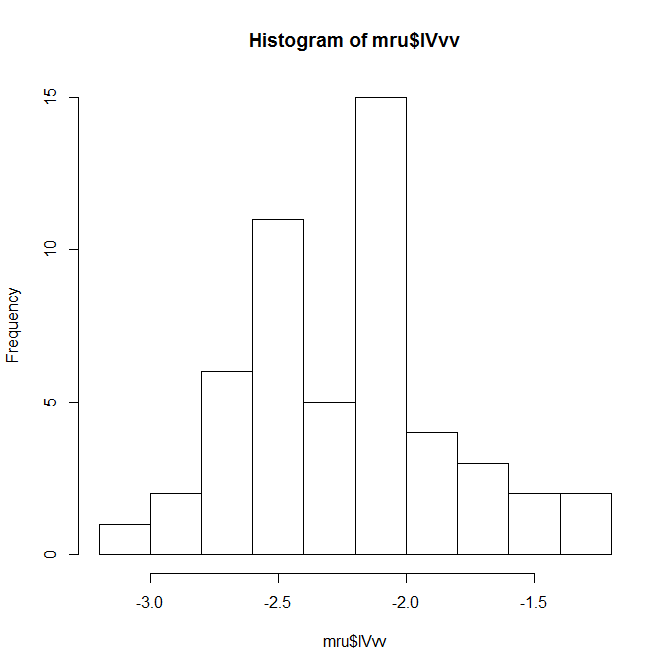

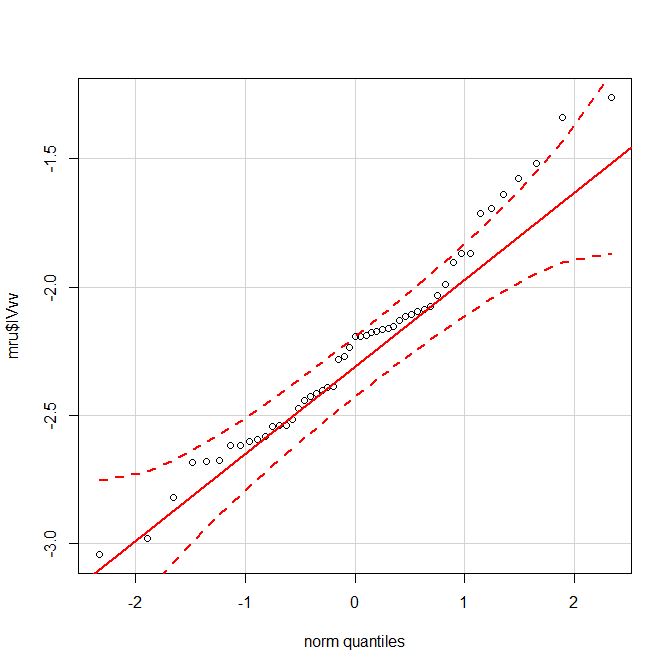


***Procoptodon gilli***

*Asfc*

Raw


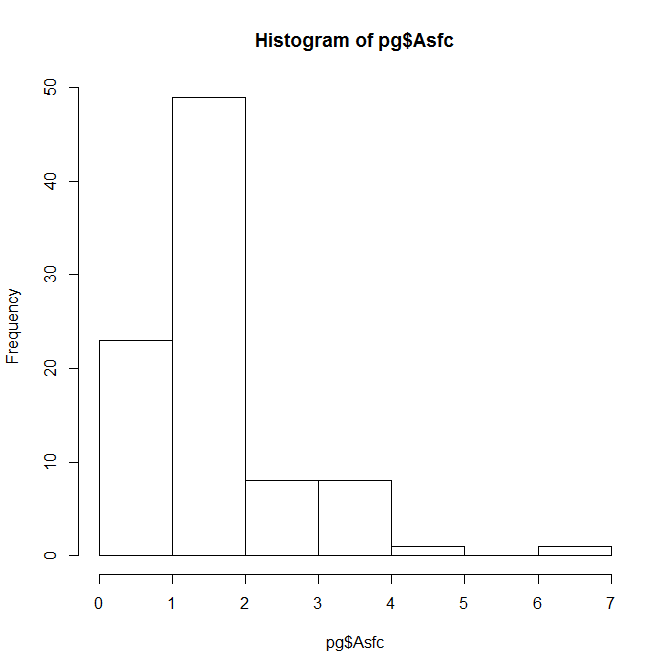

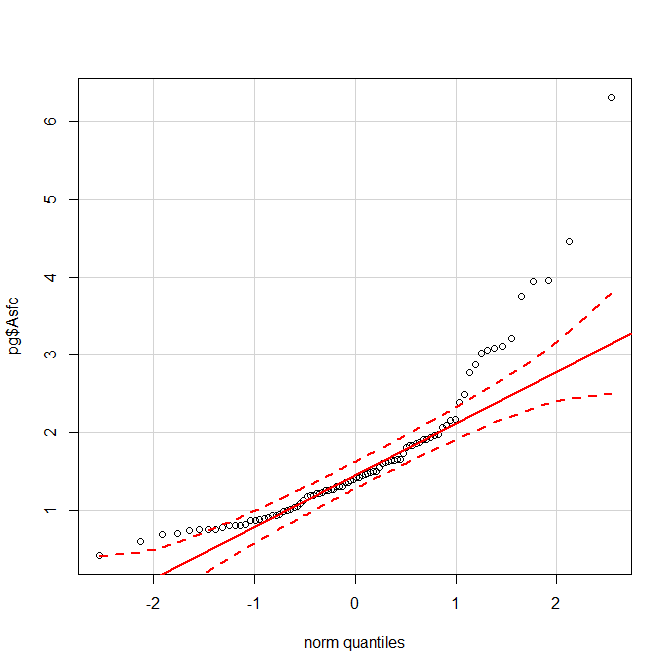


Natural logarithm transformed


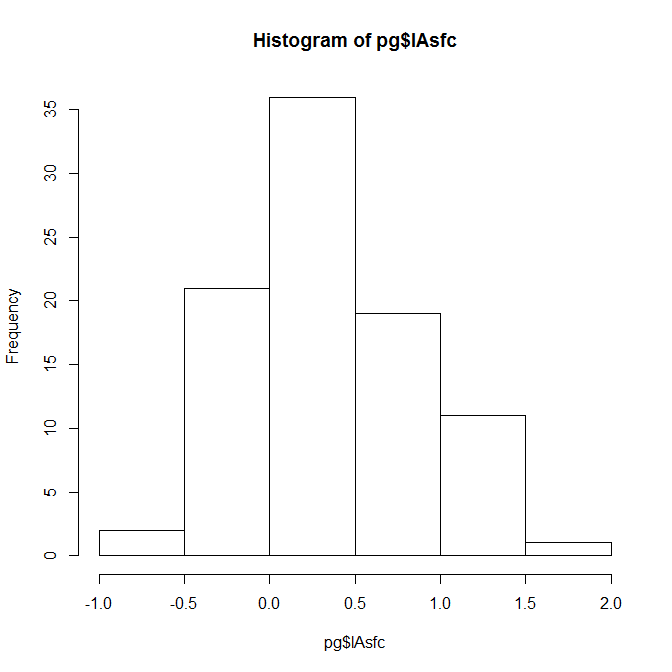

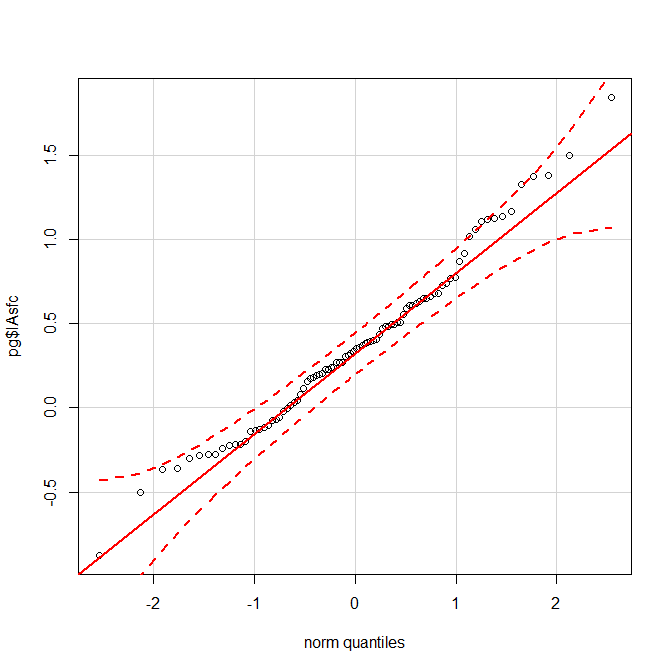


*epLsar*

Raw


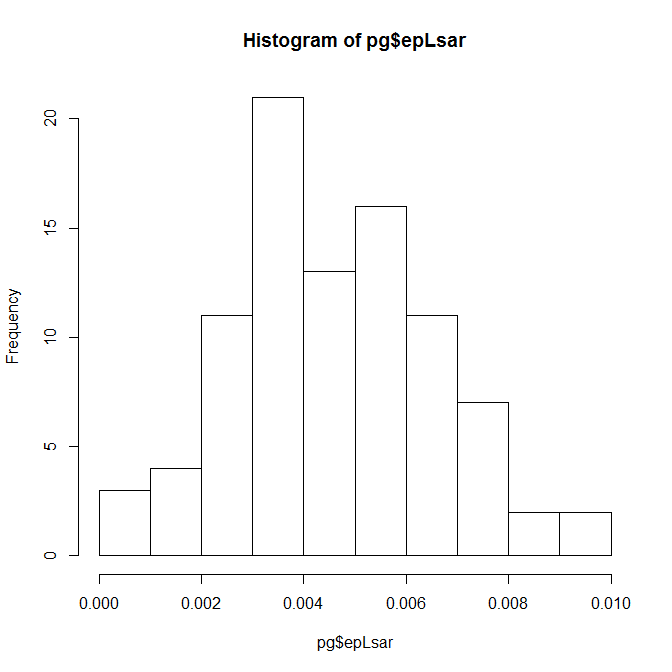

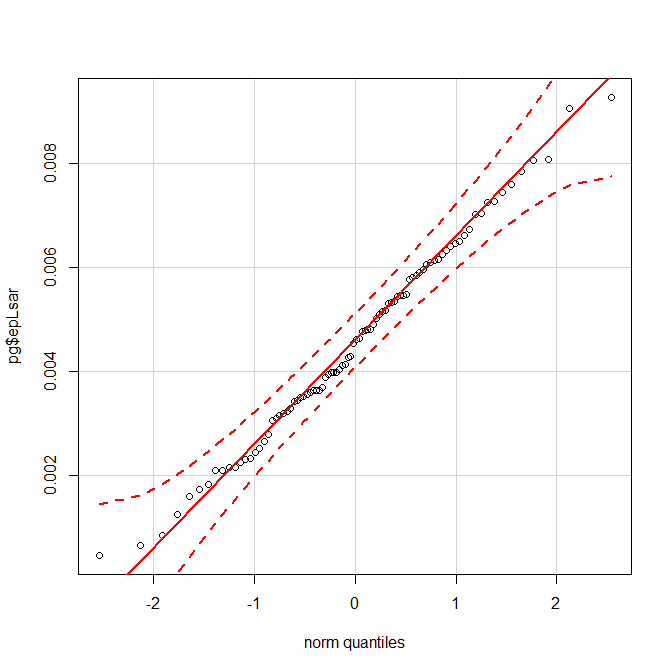


No transformation needed.

*Sdr*

Raw


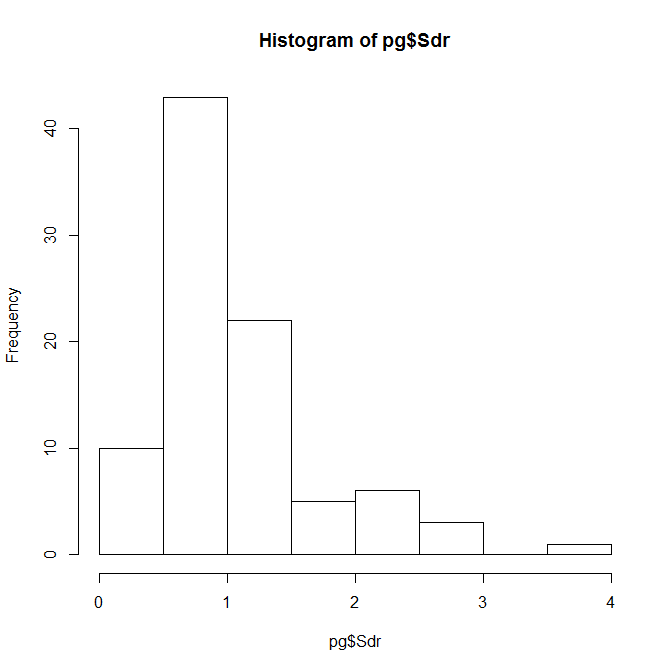

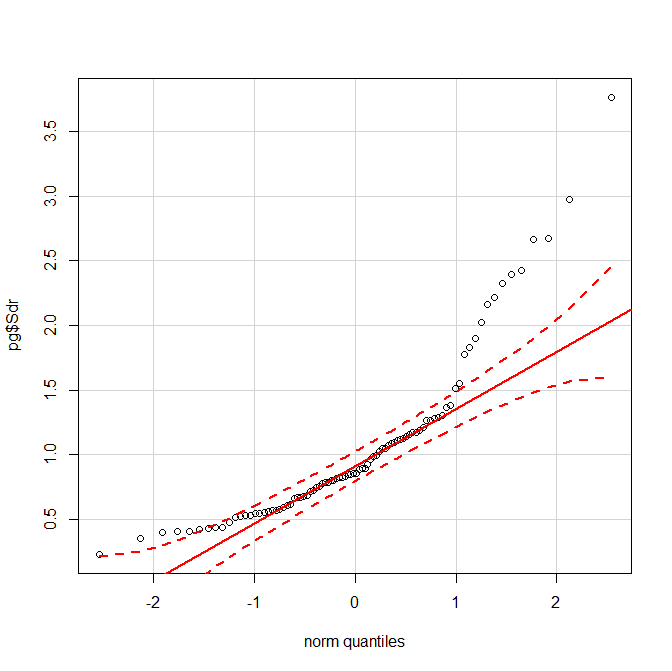


Natural logarithm transformed


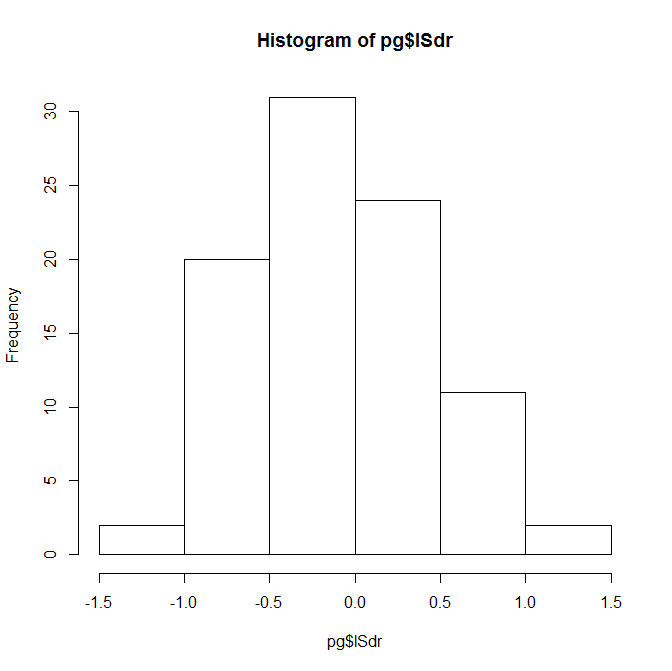

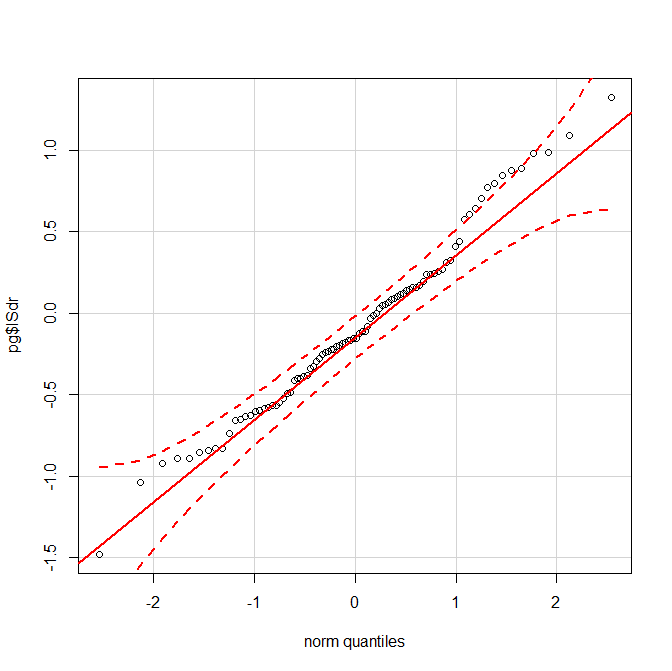


*Vvv*

Raw


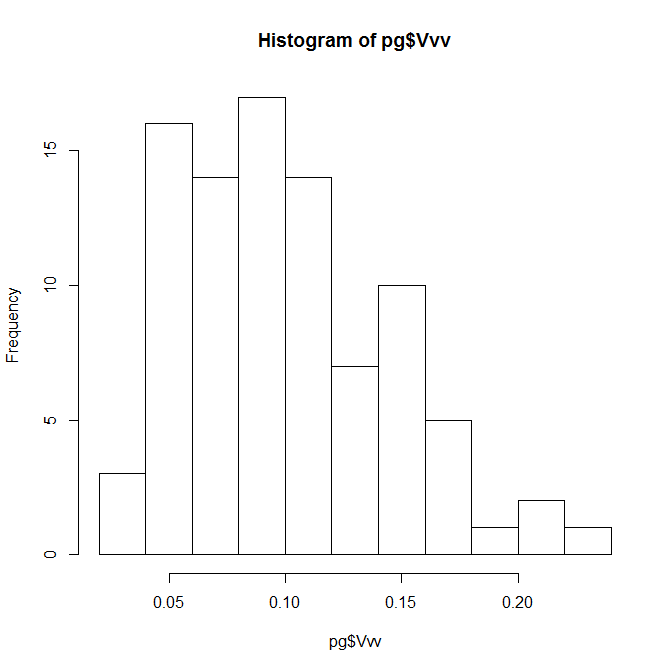

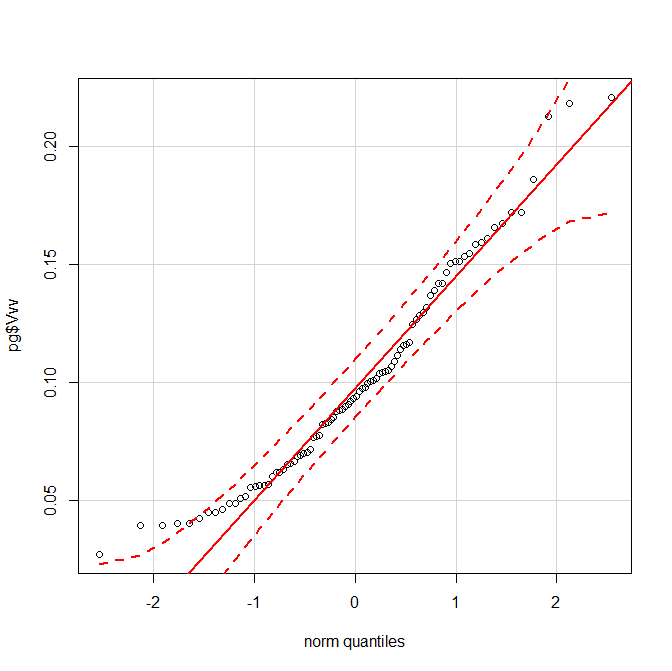


No transformation needed.

***Thylogale stigmatica***

*Asfc*

Raw


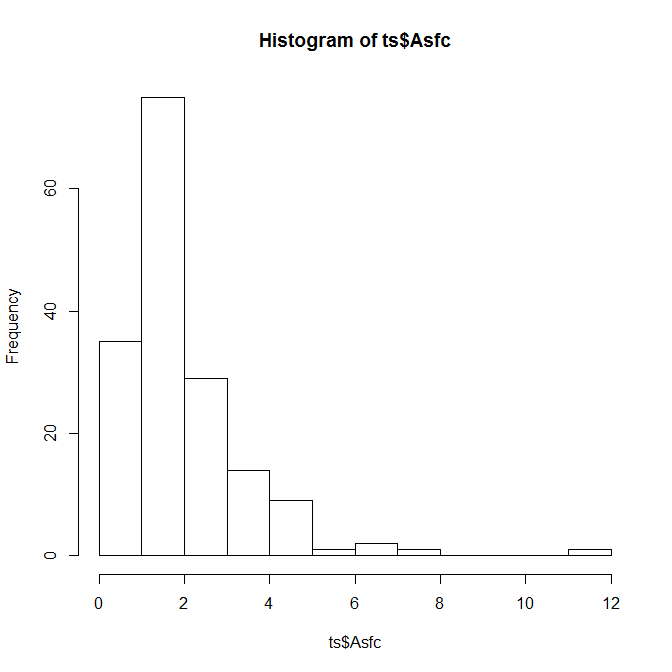

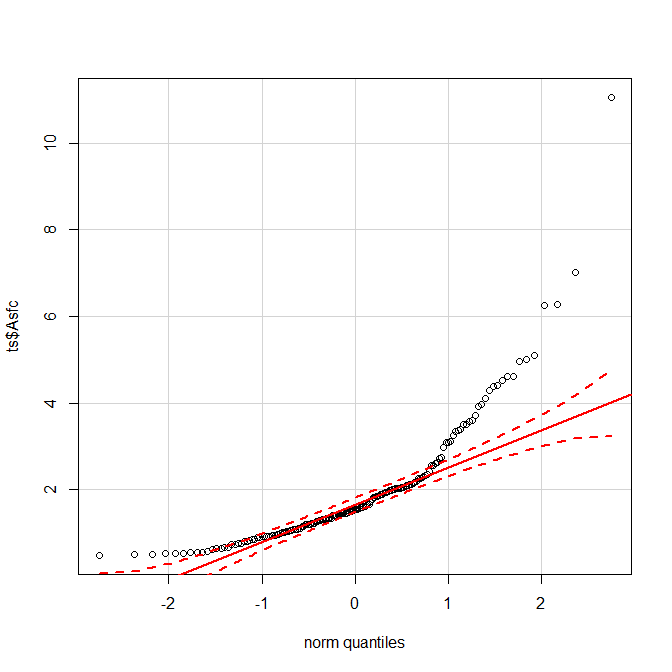


Natural logarithm transformed


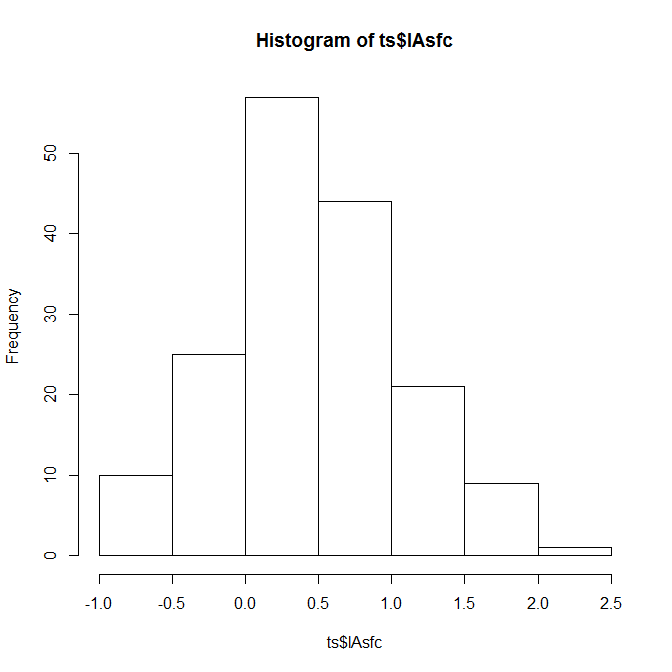

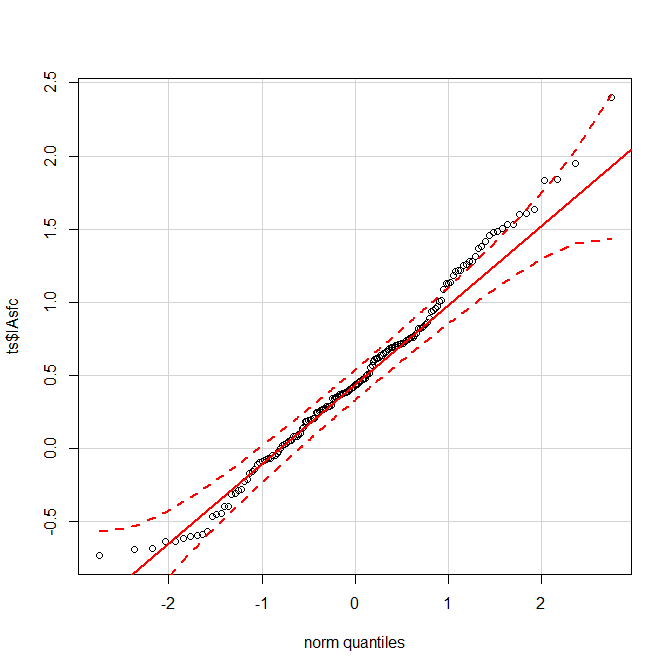


*epLsar*

Raw


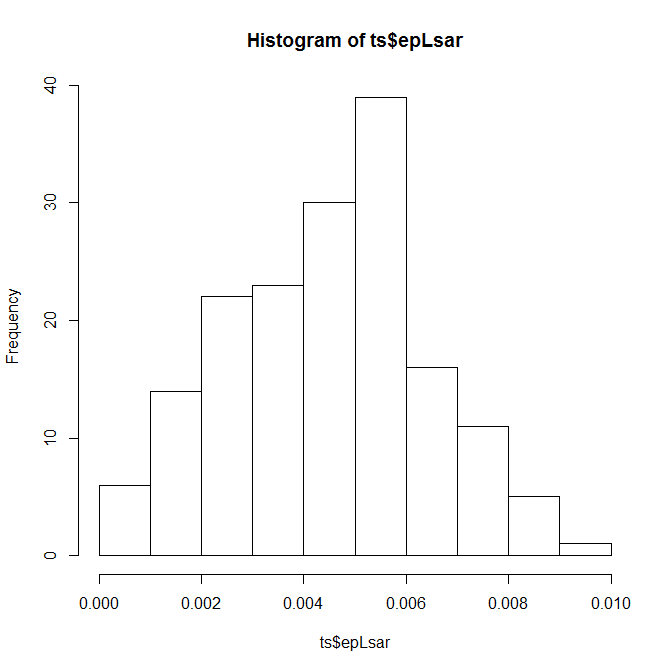

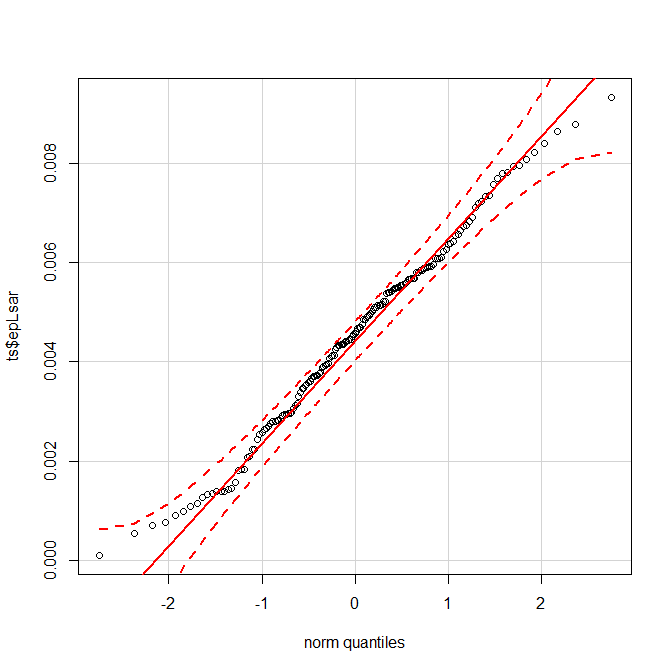


No transformation needed.

*Sdr*

Raw


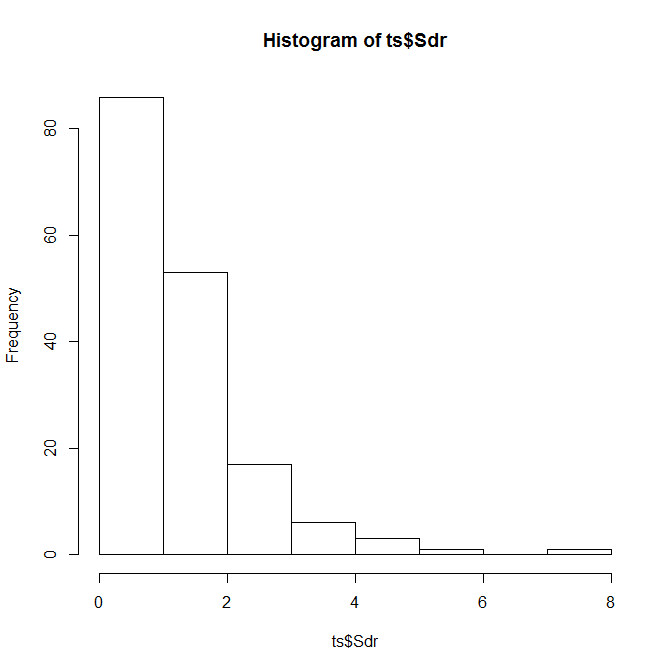

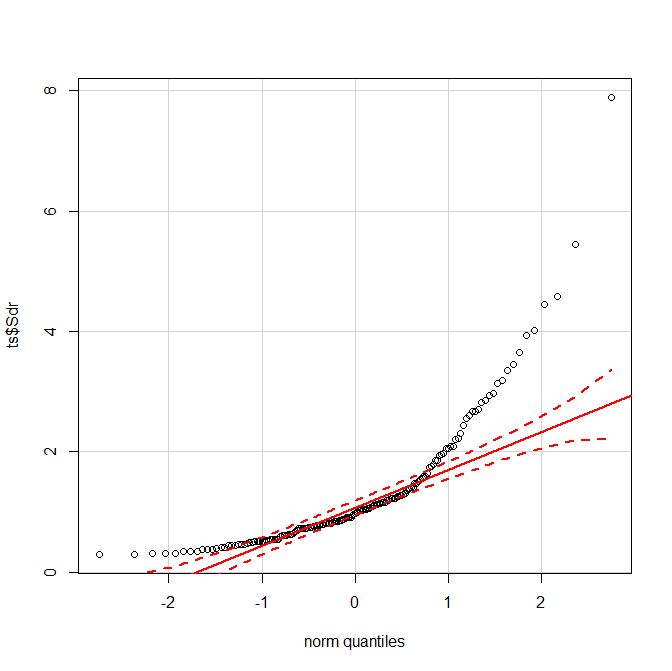


Natural logarithm transformed


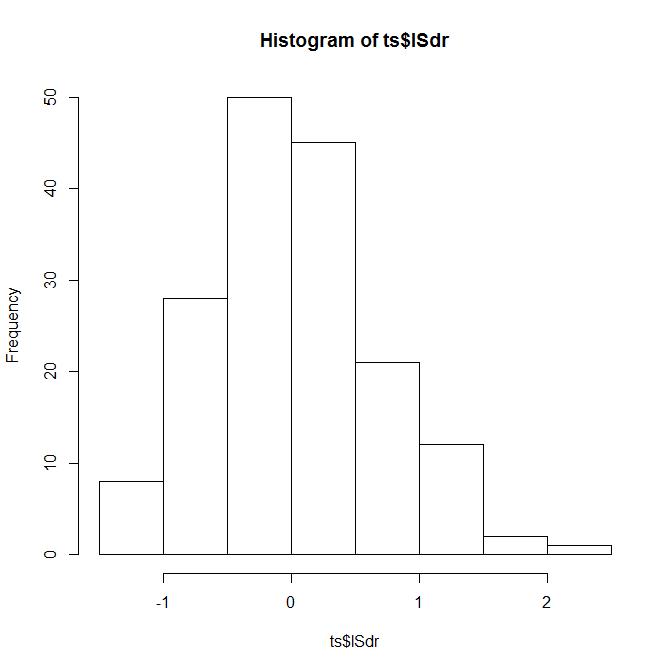

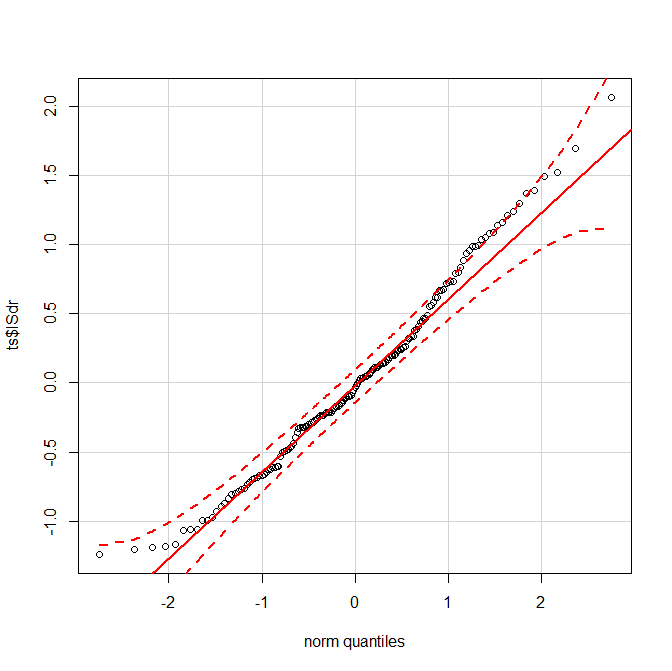


*Vvv*

Raw


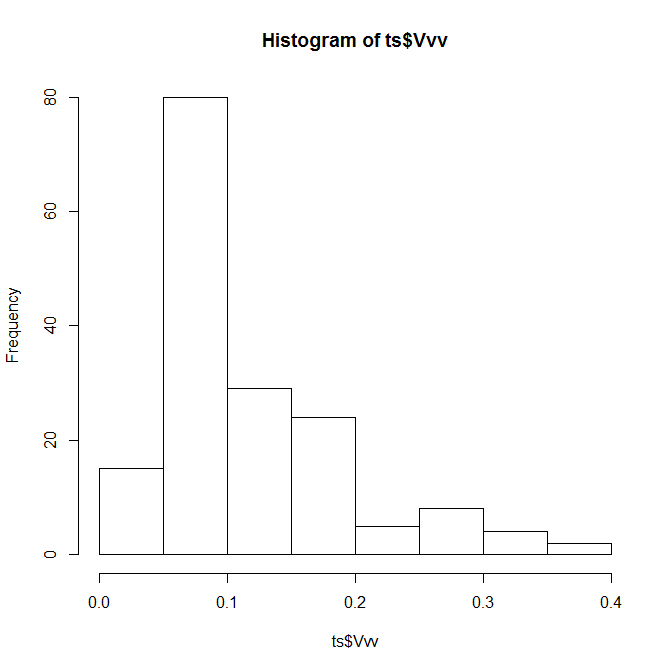

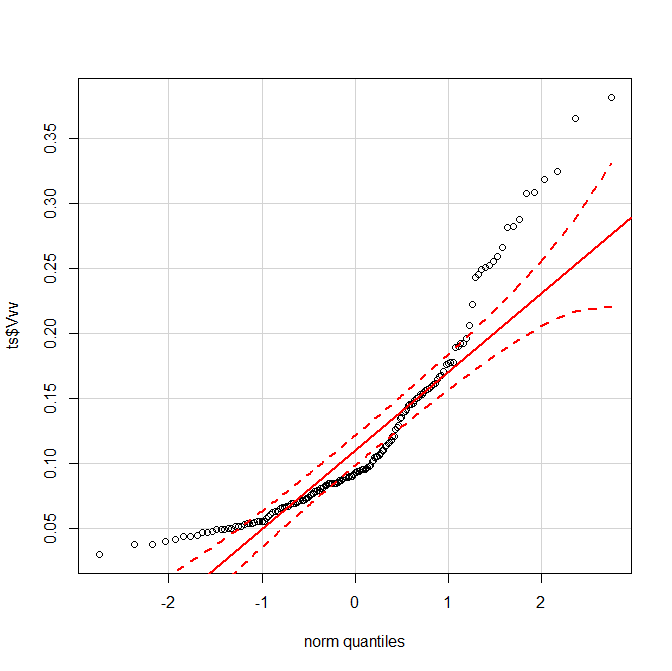


Natural logarithm transformed


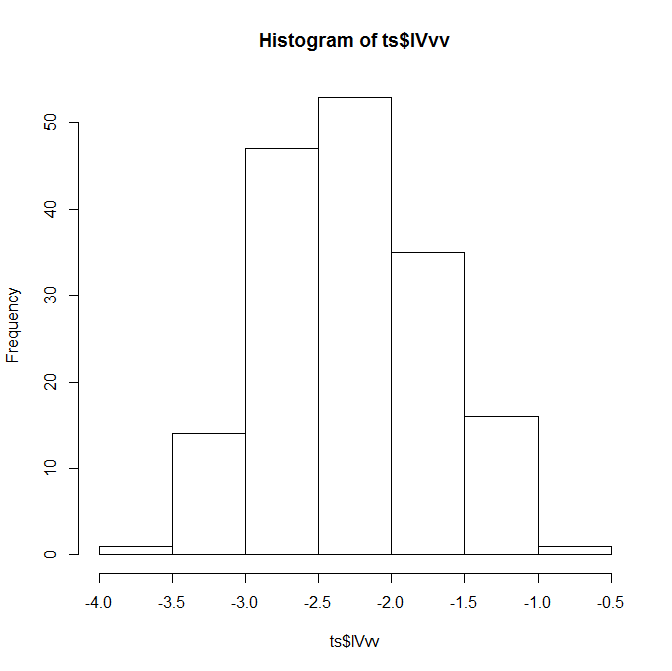

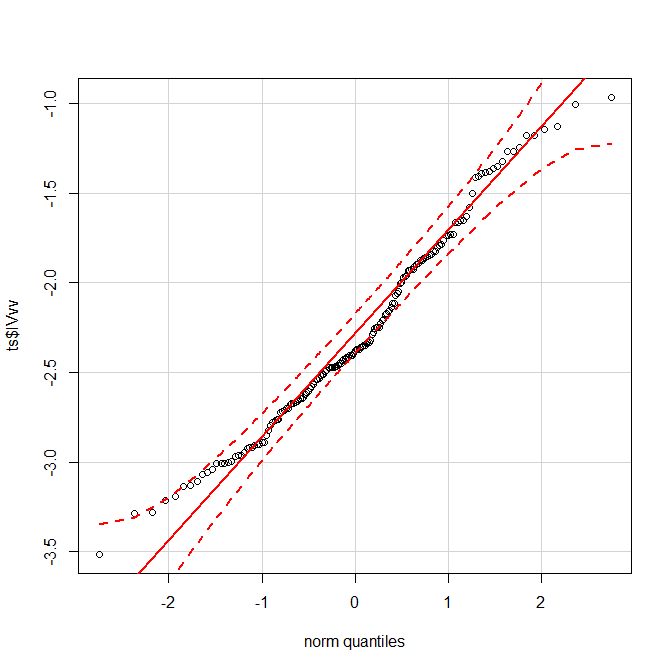


***Thylogale thetis***

*Asfc*

Raw


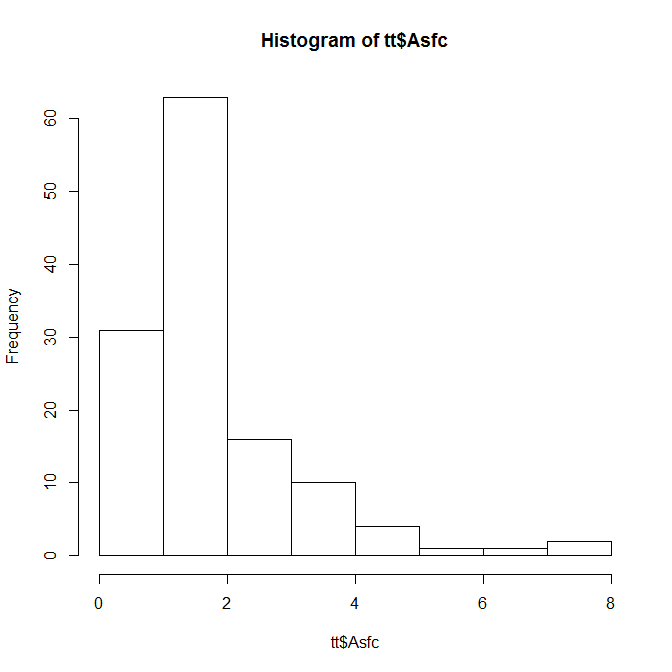

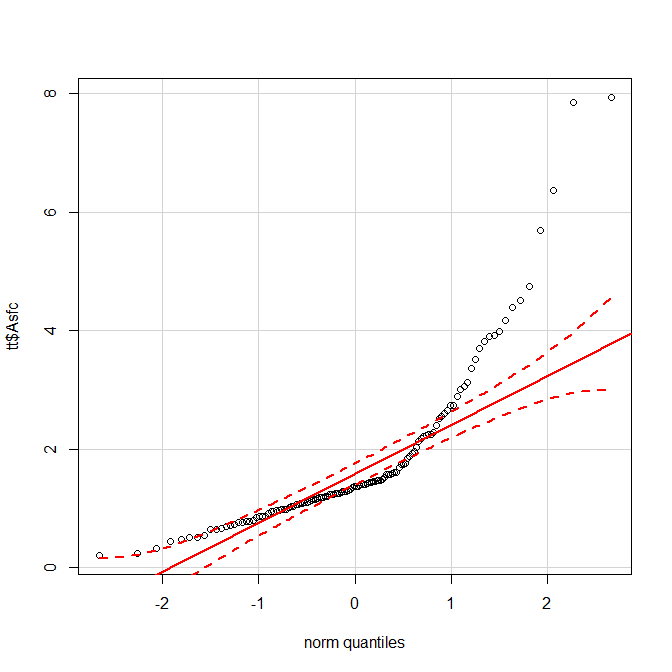


Natural logarithm transformed


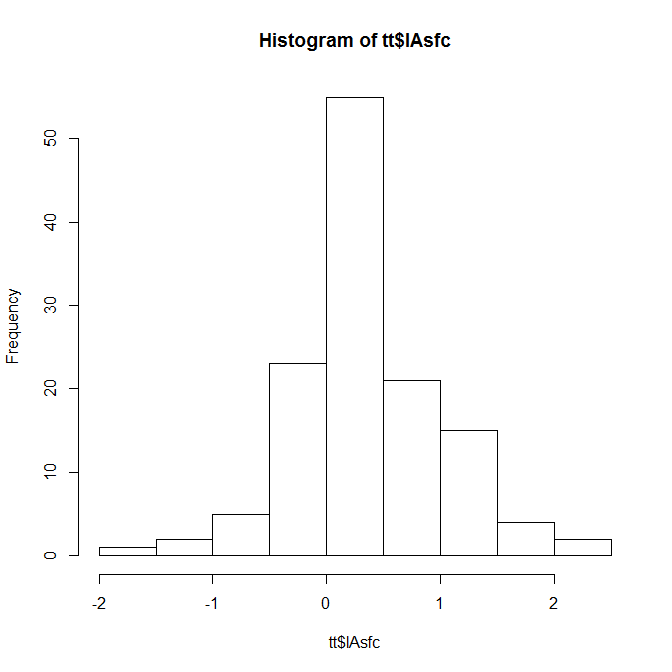

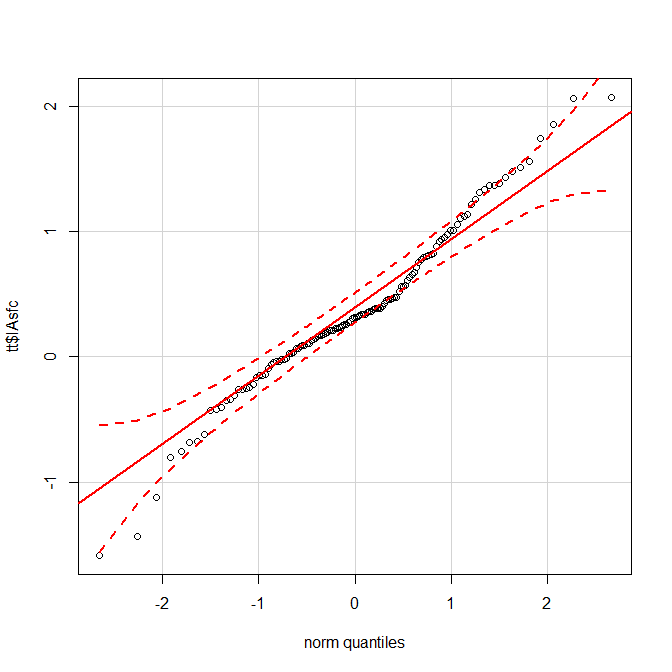


*epLsar*

Raw


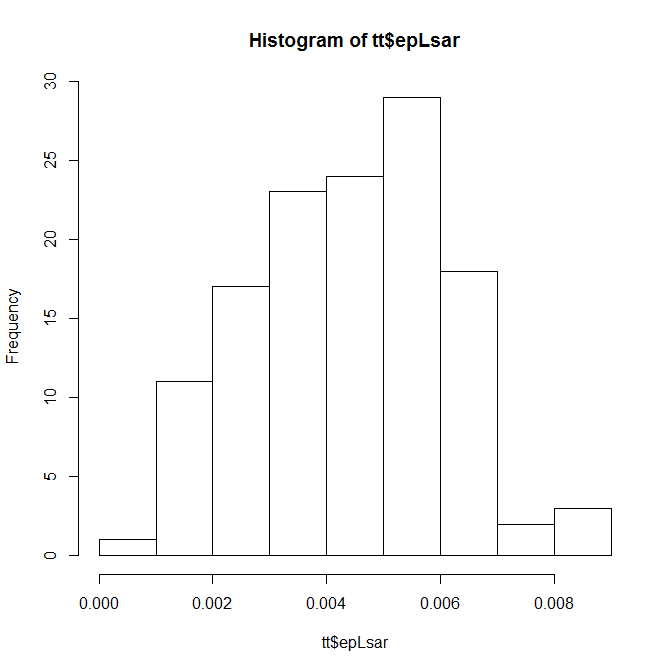

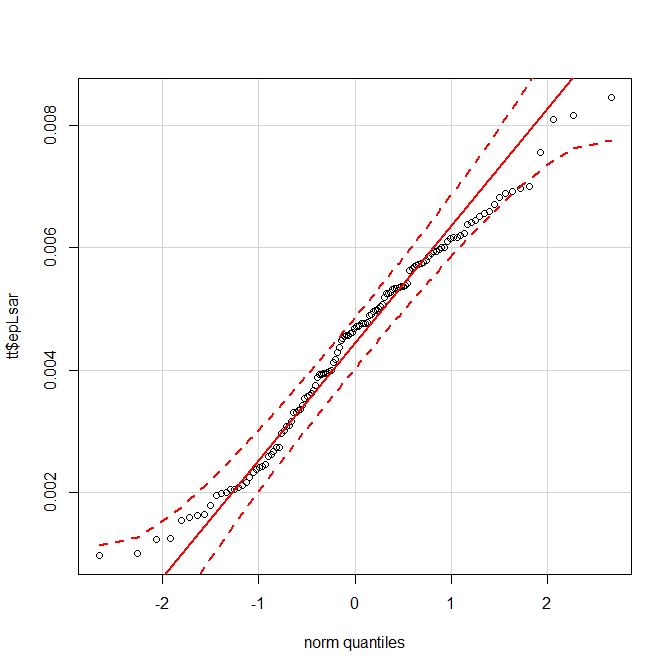


No transformation needed.

*Sdr*

Raw


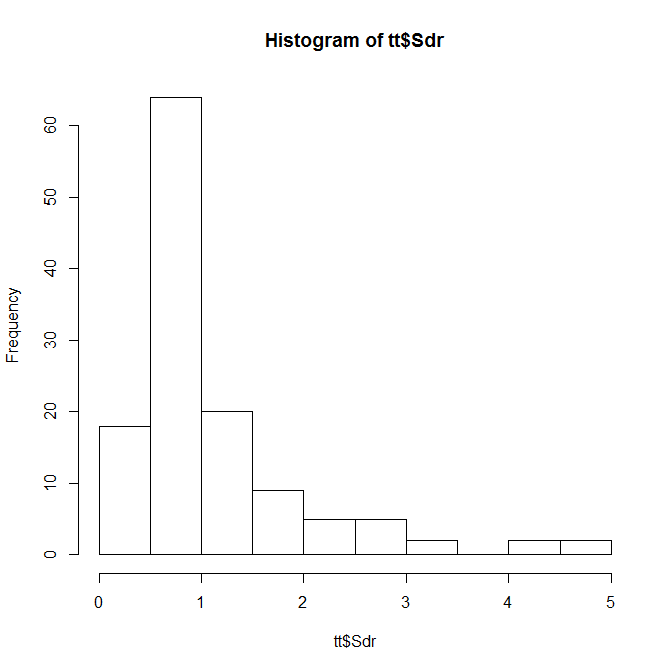

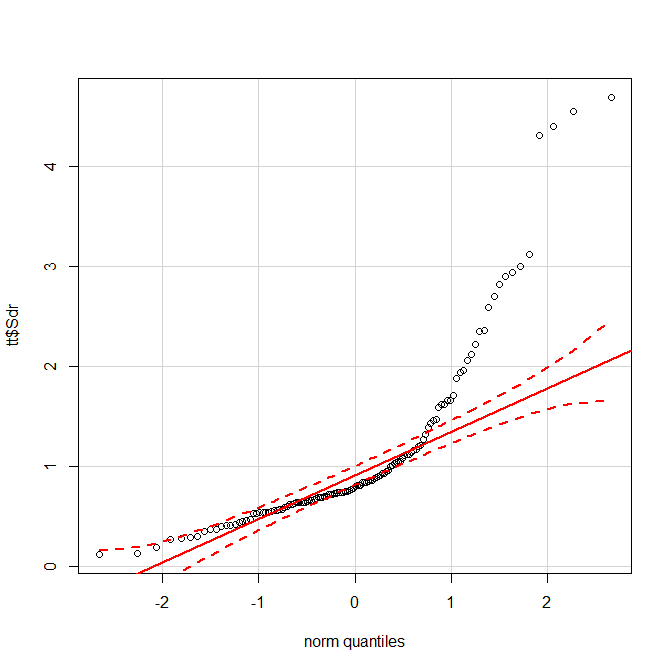


Boxcox log-likelihood plot


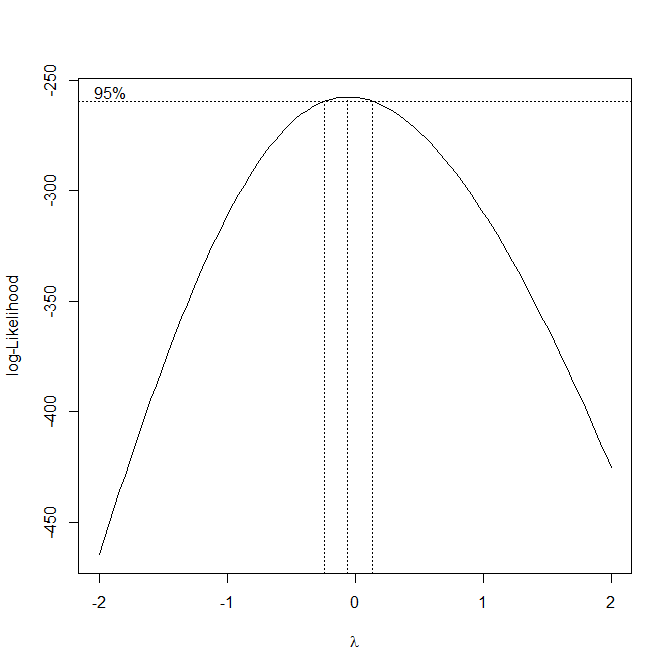


Sdr^-0.1


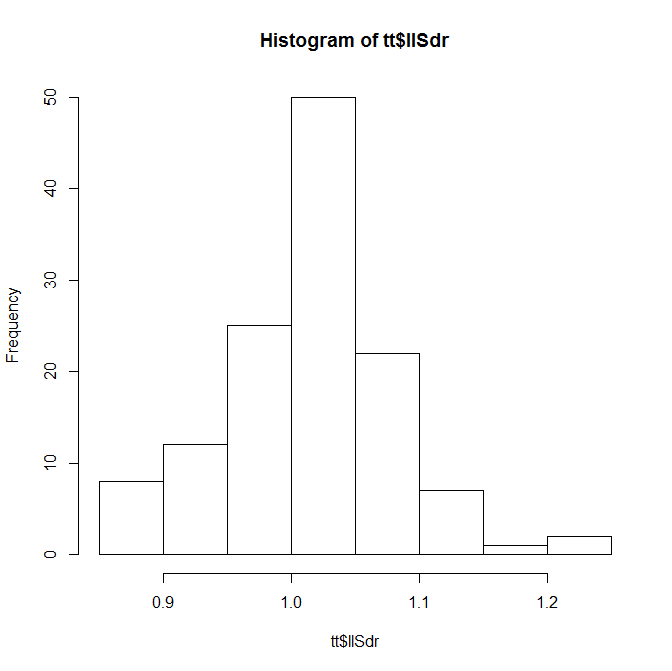

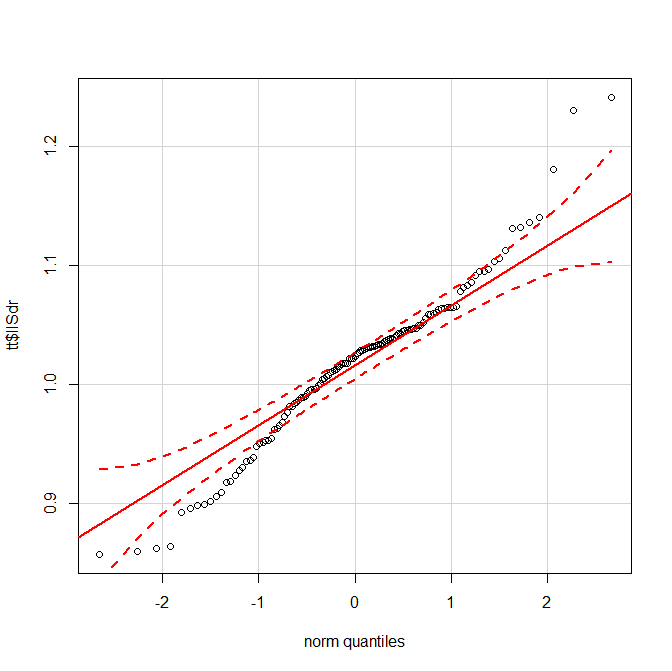


*Vvv*

Raw


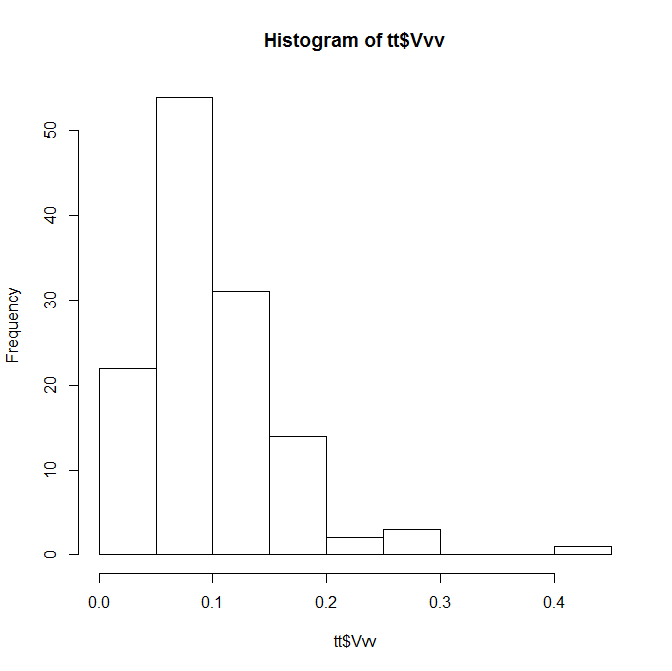

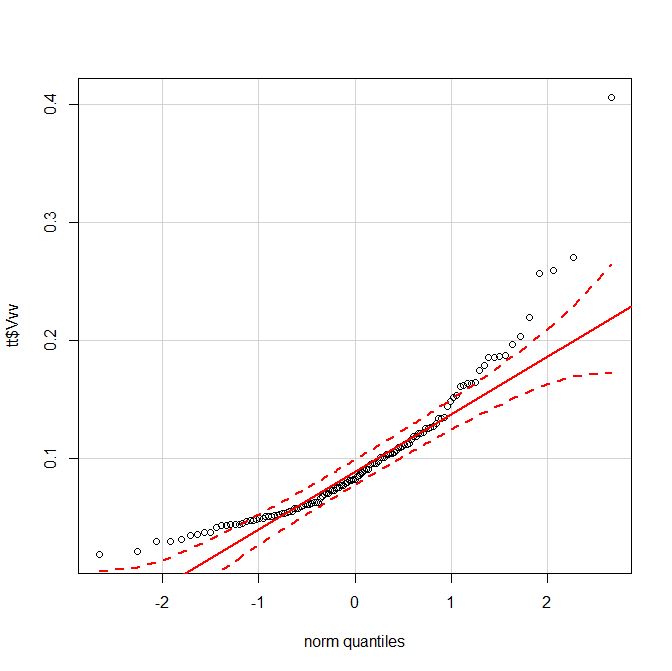


Natural logarithm transformed


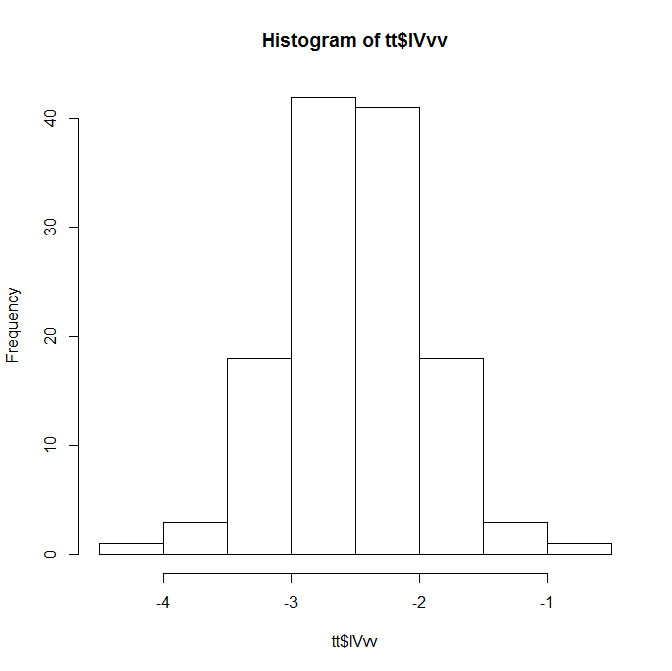

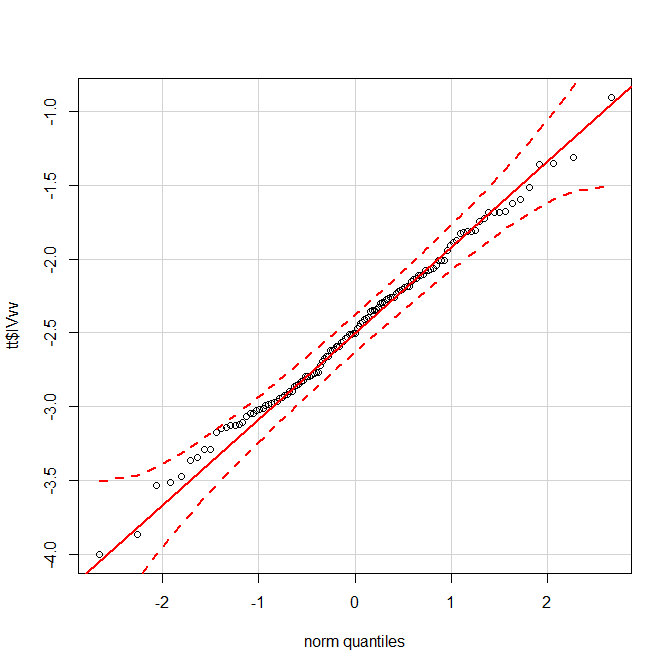


***Wallabia bicolor***

*Asfc*

Raw

Natural logarithm transformed

*epLsar*

Raw

No transformation needed.

*Sdr*

Raw

Natural logarithm transformed

*Vvv*

Raw

Natural logarithm transformed

**All Taxa**

*Asfc*

Raw

Natural logarithm transformed

*epLsar*

Raw

Boxcox log-likelihood

epLsar ^0.7

*Sdr*

Raw

Natural logarithm transformed

*Vvv*

Raw

Natural logarithm transformed
